# Supplementary material
Source: PubMed Central journal article supplement (PMC3382472)
Supplement: 1207934109_sapp.pdf [file 1207934109_sapp.pdf]

## Supporting Information

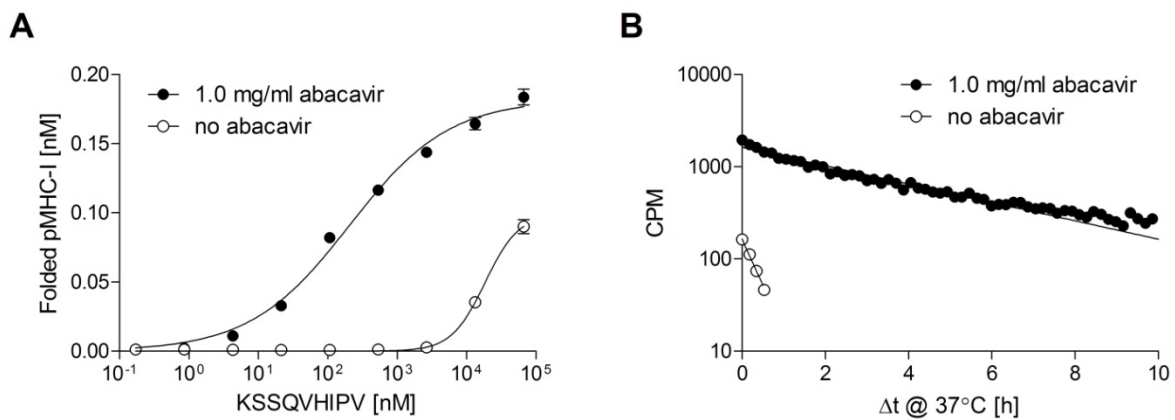

**Figure S1: Binding of pep-V to B\*57:01 in AlphaScreen and dissociation assay.**

**A)** The affinity of pep-V (KSSQVHIPV) to biotinylated recombinant B\*57:01 was determined with and without adding 1.0 mg/ml abacavir using an AlphaScreen receptor binding assay (1) based upon streptavidin coated donor-beads and W6/32 (anti-HLA class I antibody) coated acceptor-beads. In the presence of abacavir peptide KSSQVHIPV was a good binding peptide,  $K_D=207$  nM, whereas in the absence of abacavir peptide KSSQVHIPV was a very weak binder,  $K_D=18,000$  nM. **B)** Bound HLA-B\*57:01: pep-V complexes are detected in a scintillation proximity assay (SPA, (2)) using radiolabelled B2m and recombinant biotinylated MHC in a streptavidin coated SPA microplate. The signal is generated when B2m\* is bound to the bottom of the plate which only occurs in presence of a bound peptide. The dissociation measurement is started by adding excess of unlabelled B2m and raising the temperature to 37C. Measurements are made in 17 minute intervals, creating a dissociation curve. **Table S3** compares different dissociation curves of combinatorial peptide libraries using the area under the dissociation curve (AUC) as a metric divided by the AUC value of the completely randomized library and normalized to an average value of 1.

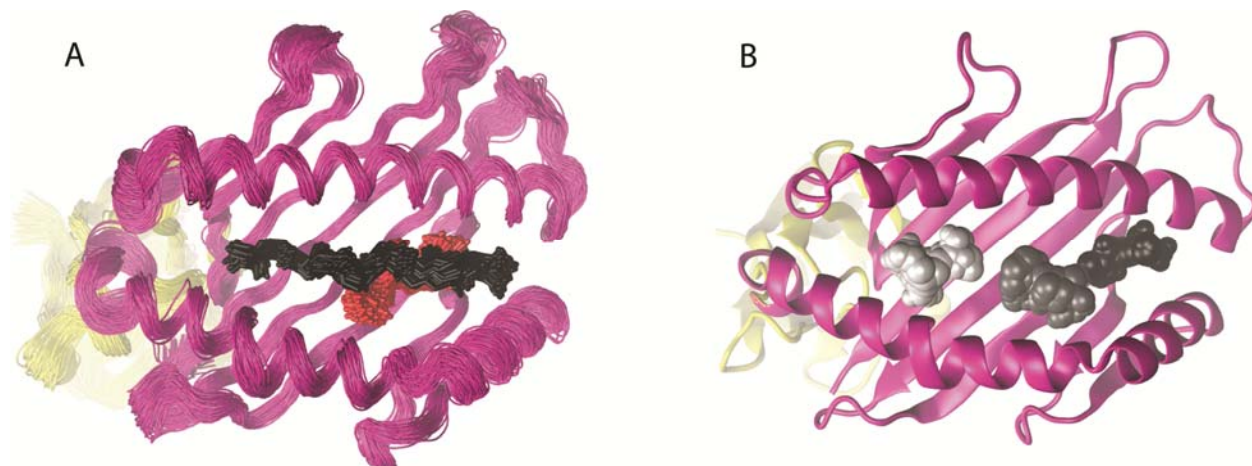

**Figure S2: Computational identification of a binding site for abacavir in HLA-B\*57:01.** Panel **A** depicts three potential binding sites for abacavir identified by computational solvent mapping (gray spheres). Panel **B** depicts an ensemble of 100 equally spaced configurations of the complex taken from 30ns of molecular dynamics simulation. Simulations indicate a stable complex on the timescale of the simulation with abacavir localized to the F-pocket, consistent with the subsequent crystal structure (Figure 3).

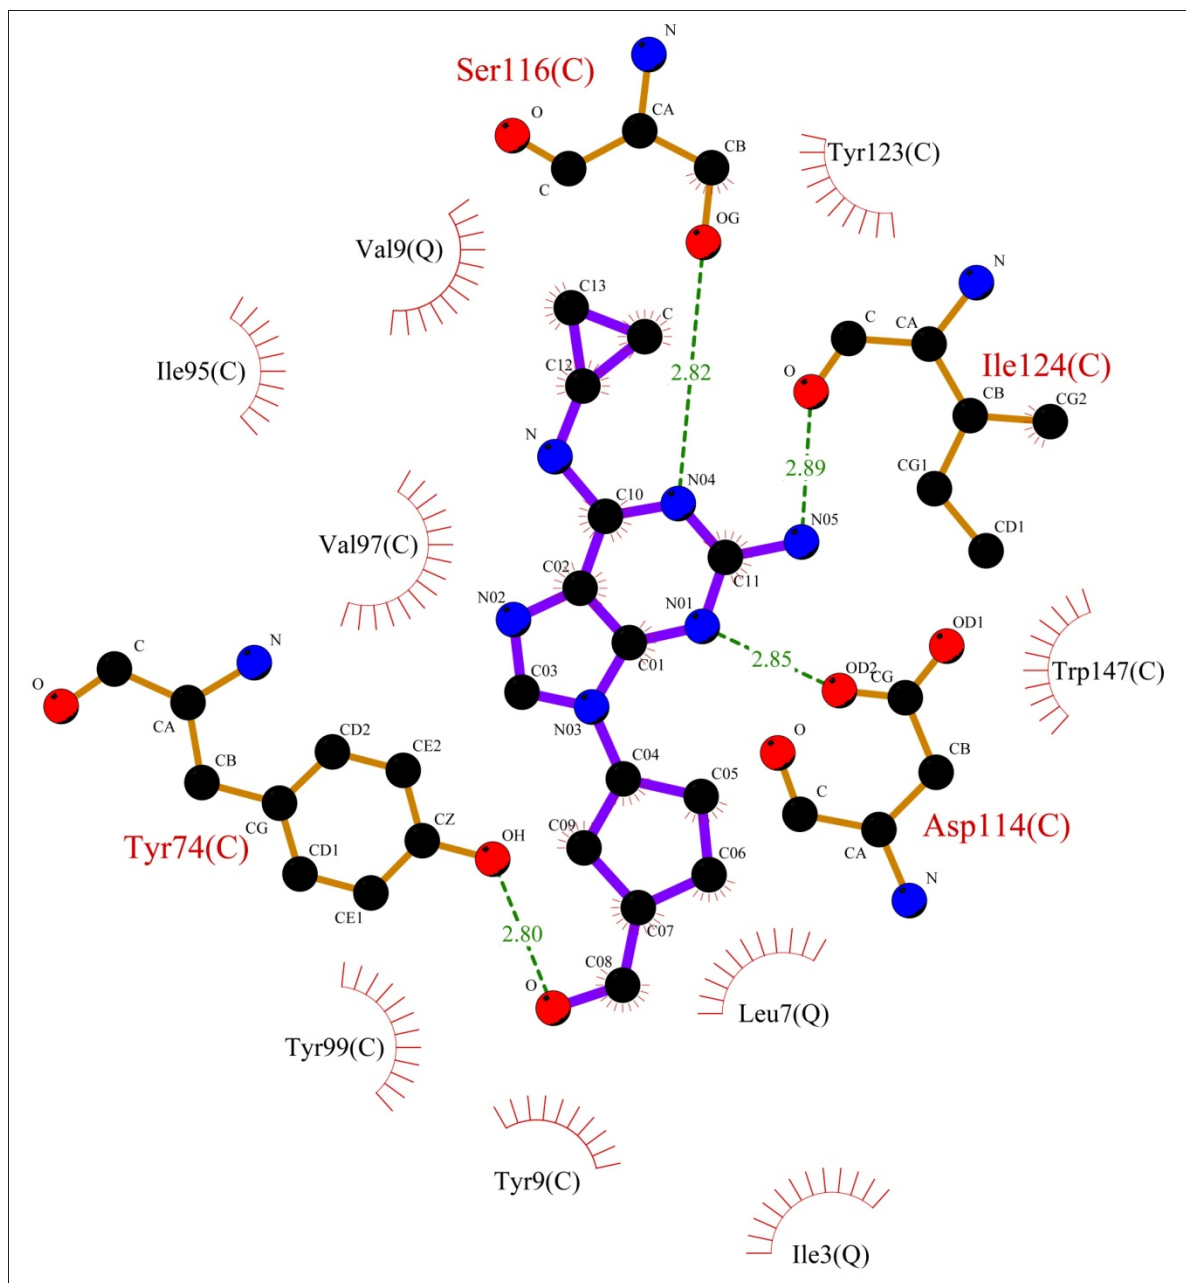

**Figure S3: Intermolecular contacts between abacavir, peptide and HLA-B\*57:01.**

Interactions of abacavir, shown in purple, with the surrounding MHC (C chain) and peptide (Q chain) residues based on PDB 3UPR. H bonds are shown as dashed lines and van der Waals contacts are shown as rays. Interactions were calculated with HBplus and Ligplot.

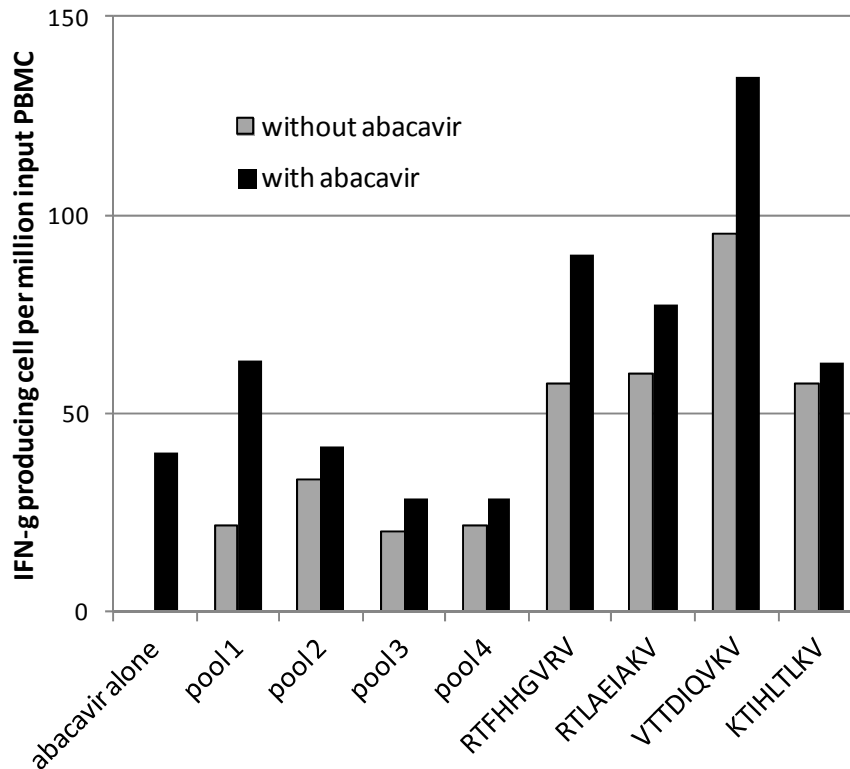

**Figure S4: T cells from hypersensitive donors respond to specific self-peptides in an abacavir dependent fashion.**

As described in Figure 4, PBMCs from a HLA-B\*57:01 positive donors with a clinical history of abacavir hypersensitivity were pulsed for 15 minutes with peptide antigens in the presence or absence of abacavir, or with abacavir alone, washed and then tested by IFN- $\gamma$  ELISpot assay. Responses from one of two donors are shown for whom there was a sufficient amount of PBMCs available to test all four pools of peptides, and also test individual peptides from pool 1 which gave the highest response of all pools. These data were used to select peptide VTDDIQVKV as an individual peptide in all donors (Figure 4).

## Supporting Information References

1. Harndahl M, *et al.* (2009) Peptide binding to HLA class I molecules: homogenous, high-throughput screening, and affinity assays. *J Biomol Screen* 14(2):173-180.
2. Harndahl M, Rasmussen M, Roder G, & Buus S (Real-time, high-throughput measurements of peptide-MHC-I dissociation using a scintillation proximity assay. *J Immunol Methods* 374(1-2):5-12.

**Table S1 - Combinatorial library scan for HLA-B\*57:01**

|   | Affinity without abcavir [IC50 nM] |        |        |       |        |       |       |       |        |
|---|------------------------------------|--------|--------|-------|--------|-------|-------|-------|--------|
|   | 1                                  | 2      | 3      | 4     | 5      | 6     | 7     | 8     | 9      |
| A | 11,000                             | 2,760  | 982    | 5,830 | 4,470  | 1,030 | 361   | 979   | 11,500 |
| C | 15,400                             | 5,220  | 2,660  | 2,960 | 4,770  | 769   | 1,190 | 1,180 | 18,000 |
| D | 15,700                             | 1,020  | 9,200  | 3,130 | 5,980  | 1,100 | 2,620 | 5,540 | *      |
| E | *                                  | 11,300 | 7,840  | 1,370 | 2,920  | 489   | 833   | 2,010 | *      |
| F | *                                  | 7,130  | 1,300  | 1,390 | 889    | 300   | 314   | 1,270 | 287    |
| G | 17,700                             | 2,580  | 2,420  | 2,270 | 4,000  | 1,200 | 948   | 1,460 | 11,800 |
| H | 3,620                              | 10,600 | 4,370  | 6,040 | 5,660  | 187   | 374   | 921   | 15,500 |
| I | 4,610                              | 3,280  | 762    | 1,350 | 3,120  | 814   | 295   | 1,130 | 472    |
| K | 3,610                              | 6,640  | 2,390  | 2,480 | 3,420  | 2,390 | 1,460 | 307   | 13,900 |
| L | 9,320                              | 1,820  | 821    | 2,420 | 2,010  | 525   | 616   | 739   | 911    |
| M | 6,730                              | 1,030  | 685    | 745   | 5,050  | 627   | 754   | 1,300 | 1,190  |
| N | 11,400                             | 11,300 | 4,200  | 832   | 8,310  | 608   | 1,020 | 585   | 15,200 |
| P | *                                  | 7,040  | 10,400 | 615   | 3,190  | 591   | 842   | 210   | *      |
| Q | 14,500                             | 15,200 | 2,530  | 361   | 11,300 | 677   | 345   | 1,250 | *      |
| R | 6,470                              | 7,270  | 1,400  | 2,080 | 16,300 | 1,270 | 563   | 483   | *      |
| S | 8,130                              | 147    | 324    | 1,230 | 1,010  | 1,200 | 790   | 673   | *      |
| T | 13,400                             | 331    | 1,050  | 1,160 | 860    | 917   | 1,590 | 1,620 | *      |
| V | *                                  | 469    | 859    | 1,020 | 539    | 582   | 349   | 1,610 | 7,470  |
| W | *                                  | 6,540  | 766    | 1,060 | 691    | 436   | 409   | 1,000 | 176    |
| Y | 13,800                             | 4,210  | 2,370  | 1,950 | 925    | 643   | 475   | 668   | 11,800 |

\*) &gt;20,000 nM

|   | Affinity with 1mg/ml abcavir [IC50 nM] |        |       |       |        |       |       |       |        |
|---|----------------------------------------|--------|-------|-------|--------|-------|-------|-------|--------|
|   | 1                                      | 2      | 3     | 4     | 5      | 6     | 7     | 8     | 9      |
| A | 12,200                                 | 2,450  | 541   | 1,560 | 1,030  | 541   | 362   | 678   | 1,720  |
| C | 16,300                                 | 4,360  | 4,240 | 2,210 | 1,740  | 547   | 703   | 981   | 17,600 |
| D | 15,800                                 | 1,560  | 3,800 | 2,520 | 2,420  | 562   | 1,340 | 1,790 | *      |
| E | 14,700                                 | 6,680  | 6,810 | 1,560 | 1,900  | 420   | 851   | 934   | 17,800 |
| F | 15,400                                 | 3,470  | 372   | 1,530 | 715    | 281   | 156   | 590   | 1,370  |
| G | 12,000                                 | 3,210  | 1,990 | 4,620 | 2,040  | 619   | 939   | 709   | 13,700 |
| H | 3,140                                  | 5,090  | 2,300 | 1,560 | 3,250  | 317   | 744   | 894   | *      |
| I | 7,700                                  | 960    | 274   | 4,290 | 1,970  | 229   | 142   | 725   | 86     |
| K | 6,760                                  | 5,660  | 2,840 | 1,540 | 8,140  | 1,210 | 1,910 | 722   | 10,400 |
| L | 10,400                                 | 1,700  | 666   | 2,110 | 1,140  | 172   | 104   | 624   | 549    |
| M | 9,180                                  | 1,170  | 454   | 1,220 | 1,470  | 227   | 367   | 842   | 740    |
| N | 12,900                                 | 6,630  | 2,740 | 1,240 | 7,250  | 271   | 861   | 632   | 17,300 |
| P | 19,500                                 | 5,890  | 3,210 | 1,370 | 5,540  | 403   | 451   | 142   | *      |
| Q | 10,700                                 | 3,400  | 2,790 | 1,030 | 10,100 | 201   | 545   | 955   | *      |
| R | 4,020                                  | 7,510  | 1,930 | 1,280 | 8,560  | 377   | 963   | 797   | *      |
| S | 8,980                                  | 206    | 478   | 1,020 | 565    | 642   | 994   | 209   | 14,500 |
| T | 9,970                                  | 369    | 452   | 817   | 601    | 564   | 849   | 1,420 | 17,600 |
| V | 14,100                                 | 1,130  | 684   | 1,760 | 445    | 395   | 164   | 710   | 851    |
| W | 13,900                                 | 11,200 | 612   | 697   | 228    | 401   | 160   | 1,060 | 475    |
| Y | 7,590                                  | 8,330  | 1,070 | 926   | 402    | 554   | 372   | 432   | 16,000 |

\*) &gt;20,000 nM

| Affinity improvement with abacavir [fold change] |      |     |     |     |     |     |            |     |            |
|--------------------------------------------------|------|-----|-----|-----|-----|-----|------------|-----|------------|
|                                                  | 1    | 2   | 3   | 4   | 5   | 6   | 7          | 8   | 9          |
| A                                                | -    | 1.1 | 1.8 | 3.7 | 4.3 | 1.9 | -          | 1.4 | <b>6.7</b> |
| C                                                | -    | 1.2 | -   | 1.3 | 2.7 | 1.4 | 1.7        | 1.2 | 1.0        |
| D                                                | -    | -   | 2.4 | 1.2 | 2.5 | 1.9 | 2.0        | 3.1 | -          |
| E                                                | >1.4 | 1.7 | 1.2 | -   | 1.5 | 1.2 | -          | 2.1 | >1.1       |
| F                                                | >1.3 | 2.1 | 3.5 | -   | 1.2 | 1.1 | 2.0        | 2.2 | -          |
| G                                                | 1.5  | -   | 1.2 | -   | 2.0 | 1.9 | 1.0        | 2.1 | -          |
| H                                                | 1.2  | 2.1 | 1.9 | 3.9 | 1.7 | -   | -          | 1.0 | -          |
| I                                                | -    | 3.4 | 2.8 | -   | 1.6 | 3.5 | 2.1        | 1.6 | <b>5.5</b> |
| K                                                | -    | 1.2 | -   | 1.6 | -   | 2.0 | -          | -   | 1.3        |
| L                                                | -    | 1.1 | 1.2 | 1.1 | 1.8 | 3.0 | <b>5.9</b> | 1.2 | 1.7        |
| M                                                | -    | -   | 1.5 | -   | 3.4 | 2.8 | 2.1        | 1.5 | 1.6        |
| N                                                | -    | 1.7 | 1.5 | -   | 1.1 | 2.2 | 1.2        | -   | -          |
| P                                                | >1   | 1.2 | 3.3 | -   | -   | 1.5 | 1.9        | 1.5 | -          |
| Q                                                | 1.4  | 4.5 | -   | -   | 1.1 | 3.4 | -          | 1.3 | -          |
| R                                                | 1.6  | -   | -   | 1.6 | 1.9 | 3.4 | -          | -   | -          |
| S                                                | -    | -   | -   | 1.2 | 1.8 | 1.9 | -          | 3.2 | >1.4       |
| T                                                | 1.3  | -   | 2.3 | 1.4 | 1.4 | 1.6 | 1.9        | 1.1 | >1.1       |
| V                                                | >1.4 | -   | 1.3 | -   | 1.2 | 1.5 | 2.1        | 2.3 | <b>8.8</b> |
| W                                                | >1.4 | -   | 1.3 | 1.5 | 3.0 | 1.1 | 2.6        | -   | -          |
| Y                                                | 1.8  | -   | 2.2 | 2.1 | 2.3 | 1.2 | 1.3        | 1.5 | -          |

**Table S2 - Combinatorial library scan for HLA-B\*58:01**

| Affinity without abcavir [IC50 nM] |        |       |        |       |        |       |       |       |        |
|------------------------------------|--------|-------|--------|-------|--------|-------|-------|-------|--------|
|                                    | 1      | 2     | 3      | 4     | 5      | 6     | 7     | 8     | 9      |
| A                                  | *      | 748   | 1,290  | 5,260 | 2,920  | 1,320 | 956   | 1,420 | 17,500 |
| C                                  | *      | 2,060 | 6,640  | 4,270 | 6,670  | 1,100 | 1,830 | 3,160 | *      |
| D                                  | *      | 3,320 | 3,050  | 3,360 | 1,450  | 849   | 2,860 | 6,370 | *      |
| E                                  | *      | 6,340 | 7,540  | 3,900 | 5,500  | 1,890 | 1,150 | 5,790 | *      |
| F                                  | *      | 1,800 | 1,250  | 2,020 | 2,280  | 696   | 405   | 1,540 | 601    |
| G                                  | *      | 2,960 | 1,650  | 8,000 | 1,160  | 1,650 | 1,970 | 1,410 | *      |
| H                                  | 11,300 | 9,920 | 7,180  | 8,140 | 3,310  | 1,380 | 1,090 | 1,050 | *      |
| I                                  | 17,600 | 3,910 | 1,300  | 6,710 | 4,500  | 755   | 670   | 1,200 | 590    |
| K                                  | 9,710  | 2,450 | 11,800 | 4,030 | 12,900 | 4,260 | 5,980 | 831   | *      |
| L                                  | 19,000 | 1,200 | 1,440  | 2,100 | 6,530  | 984   | 1,070 | 865   | 2,430  |
| M                                  | 16,400 | 807   | 1,150  | 1,560 | 3,210  | 760   | 1,120 | 1,260 | 1,280  |
| N                                  | *      | 5,510 | 1,580  | 2,710 | 1,280  | 967   | 1,170 | 769   | 13,300 |
| P                                  | *      | 2,690 | 13,100 | 1,010 | 4,990  | 952   | 1,240 | 235   | *      |
| Q                                  | *      | 1,460 | 2,990  | 1,880 | 12,200 | 729   | 675   | 2,770 | *      |
| R                                  | 7,410  | 7,790 | 8,240  | 3,910 | 10,000 | 1,560 | 2,030 | 1,340 | *      |
| S                                  | 16,300 | 409   | 751    | 2,540 | 1,530  | 1,020 | 1,250 | 580   | *      |
| T                                  | *      | 1,190 | 1,120  | 1,450 | 1,280  | 1,170 | 2,070 | 5,200 | *      |
| V                                  | *      | 1,480 | 747    | 1,100 | 1,590  | 916   | 623   | 2,040 | 12,800 |
| W                                  | *      | 6,780 | 1,030  | 1,790 | 717    | 1,240 | 525   | 1,790 | 387    |
| Y                                  | *      | 7,520 | 4,560  | 2,460 | 426    | 1,430 | 938   | 648   | 11,900 |

\*) >20,000 nM

| Affinity with 1mg/ml abacavir [IC50 nM] |        |        |        |        |        |       |       |       |        |
|-----------------------------------------|--------|--------|--------|--------|--------|-------|-------|-------|--------|
|                                         | 1      | 2      | 3      | 4      | 5      | 6     | 7     | 8     | 9      |
| A                                       | *      | 1,350  | 1,770  | 9,800  | 2,850  | 1,270 | 1,830 | 1,420 | 16,800 |
| C                                       | *      | 17,300 | 12,300 | 6,820  | 5,140  | 1,900 | 2,560 | 2,980 | 13,200 |
| D                                       | 17,500 | 16,300 | 5,360  | 7,090  | 7,410  | 1,390 | 6,300 | 9,880 | *      |
| E                                       | 19,000 | 9,980  | 7,290  | 6,770  | 2,030  | 977   | 1,270 | 3,610 | *      |
| F                                       | *      | 9,620  | 1,470  | 3,110  | 5,020  | 811   | 418   | 2,340 | 536    |
| G                                       | *      | 6,880  | 2,730  | 5,080  | 6,620  | 5,900 | 4,310 | 1,800 | 17,200 |
| H                                       | 12,400 | 14,300 | 15,300 | 10,800 | 13,400 | 1,490 | 1,290 | 4,790 | *      |
| I                                       | 10,200 | 6,300  | 1,870  | 4,710  | 14,500 | 1,640 | 930   | 1,000 | 2,120  |
| K                                       | 16,100 | 15,700 | 14,300 | 9,120  | 4,470  | 9,420 | 5,870 | 1,810 | *      |
| L                                       | 13,400 | 8,930  | 2,340  | 4,360  | 7,810  | 793   | 687   | 867   | 2,720  |
| M                                       | 5,600  | 1,880  | 1,400  | 3,130  | 7,950  | 1,100 | 1,200 | 2,470 | 976    |
| N                                       | *      | 10,400 | 3,000  | 1,360  | 5,790  | 986   | 966   | 1,240 | 19,700 |
| P                                       | *      | 7,150  | 8,760  | 1,650  | 6,290  | 1,660 | 1,130 | 467   | *      |
| Q                                       | *      | 7,100  | 6,080  | 2,140  | 11,800 | 835   | 1,210 | 3,680 | *      |
| R                                       | 12,400 | 4,240  | 10,900 | 6,510  | 15,000 | 3,030 | 3,330 | 2,770 | *      |
| S                                       | 13,500 | 421    | 1,190  | 1,620  | 1,540  | 1,190 | 1,690 | 1,140 | *      |
| T                                       | 19,200 | 1,750  | 1,310  | 1,550  | 1,340  | 1,180 | 3,880 | 6,920 | *      |
| V                                       | *      | 2,380  | 1,630  | 2,610  | 2,190  | 725   | 1,120 | 4,120 | *      |
| W                                       | *      | 10,700 | 1,450  | 2,300  | 1,000  | 1,120 | 754   | 3,960 | 594    |
| Y                                       | 19,900 | 11,500 | 4,680  | 1,720  | 1,490  | 1,670 | 426   | 1,530 | 8,580  |

\*) >20,000 nM

| Affinity improvement with abacavir [fold change] |      |     |     |     |     |     |     |     |      |
|--------------------------------------------------|------|-----|-----|-----|-----|-----|-----|-----|------|
|                                                  | 1    | 2   | 3   | 4   | 5   | 6   | 7   | 8   | 9    |
| A                                                | -    | -   | -   | -   | 1.0 | 1.0 | -   | -   | 1.0  |
| C                                                | -    | -   | -   | -   | 1.3 | -   | -   | 1.1 | >1.5 |
| D                                                | >1.1 | -   | -   | -   | -   | -   | -   | -   | -    |
| E                                                | >1.1 | -   | 1.0 | -   | 2.7 | 1.9 | -   | 1.6 | -    |
| F                                                | -    | -   | -   | -   | -   | -   | -   | -   | 1.1  |
| G                                                | -    | -   | -   | 1.6 | -   | -   | -   | -   | >1.2 |
| H                                                | -    | -   | -   | -   | -   | -   | -   | -   | -    |
| I                                                | 1.7  | -   | -   | 1.4 | -   | -   | -   | 1.2 | -    |
| K                                                | -    | -   | -   | -   | 2.9 | -   | 1.0 | -   | -    |
| L                                                | 1.4  | -   | -   | -   | -   | 1.2 | 1.6 | -   | -    |
| M                                                | 2.9  | -   | -   | -   | -   | -   | -   | -   | 1.3  |
| N                                                | -    | -   | -   | 2.0 | -   | -   | 1.2 | -   | -    |
| P                                                | -    | -   | 1.5 | -   | -   | -   | 1.1 | -   | -    |
| Q                                                | -    | -   | -   | -   | 1.0 | -   | -   | -   | -    |
| R                                                | -    | 1.8 | -   | -   | -   | -   | -   | -   | -    |
| S                                                | 1.2  | -   | -   | 1.6 | -   | -   | -   | -   | -    |
| T                                                | >1   | -   | -   | -   | -   | -   | -   | -   | -    |
| V                                                | -    | -   | -   | -   | -   | 1.3 | -   | -   | -    |
| W                                                | -    | -   | -   | -   | -   | 1.1 | -   | -   | -    |
| Y                                                | >1   | -   | -   | 1.4 | -   | -   | 2.2 | -   | 1.4  |



**Table S3: C-terminal combinatorial library scan of HLA B\*57:01 and HLA B\*57:03 in the dissociation assay.**

| Peptide | HLA B*57:01 |           |             | HLA B*57:03 |           |        |
|---------|-------------|-----------|-------------|-------------|-----------|--------|
|         | -abacavir   | +abacavir | Diff^2      | -abacavir   | +abacavir | Diff^2 |
| X8A     | 0.0         | 1.0       | <b>0.8</b>  | 0.2         | 0.2       | 0.0    |
| X8C     | 0.3         | 0.7       | 0.1         | 1.0         | 1.0       | 0.0    |
| X8D     | 0.1         | 0.0       | 0.0         | 0.1         | 0.1       | 0.0    |
| X8E     | 0.2         | 0.0       | 0.0         | 0.1         | 0.1       | 0.0    |
| X8F     | 4.2         | 1.8       | <b>5.8</b>  | 4.4         | 4.2       | 0.0    |
| X8G     | 0.2         | 0.4       | 0.1         | 0.1         | 0.1       | 0.0    |
| X8H     | 0.5         | 0.0       | 0.2         | 0.3         | 0.2       | 0.0    |
| X8I     | 1.5         | 4.2       | <b>7.2</b>  | 2.2         | 2.1       | 0.0    |
| X8K     | 0.1         | 0.0       | 0.0         | 0.1         | 0.1       | 0.0    |
| X8L     | 0.7         | 1.6       | <b>0.9</b>  | 1.8         | 1.7       | 0.0    |
| X8M     | 1.2         | 2.2       | <b>1.0</b>  | 2.1         | 2.0       | 0.0    |
| X8N     | 0.0         | 0.1       | 0.0         | 0.1         | 0.0       | 0.0    |
| X8P     | 0.0         | 0.4       | 0.2         | 0.2         | 0.2       | 0.0    |
| X8Q     | 0.0         | 0.1       | 0.0         | 0.1         | 0.1       | 0.0    |
| X8R     | 0.1         | 0.1       | 0.0         | 0.1         | 0.1       | 0.0    |
| X8S     | 0.4         | 0.3       | 0.0         | 0.1         | 0.1       | 0.0    |
| X8T     | 0.2         | 0.5       | 0.1         | 0.1         | 0.1       | 0.0    |
| X8V     | 0.3         | 2.0       | <b>2.8</b>  | 0.9         | 1.0       | 0.0    |
| X8W     | 7.7         | 3.3       | <b>18.8</b> | 4.8         | 4.9       | 0.0    |
| X8Y     | 2.2         | 1.1       | <b>1.4</b>  | 1.3         | 1.6       | 0.1    |

Dissociation curves were generated as explained in Supplemental Figure 3. The reported values are area under the dissociation curve (AUC) divided by the AUC value of the completely randomized library and normalized to an average value of 1 per column

**Table S4: X-ray data collection and statistics**

| Field                                                             | Value                                      |
|-------------------------------------------------------------------|--------------------------------------------|
| <b>Protein</b>                                                    | HLA B*57:01•β-microglobulin•pep-V•abacavir |
| <b>PDB Accession Code</b>                                         | 3UPR                                       |
| <b>Space Group</b>                                                | P 1 2 <sub>1</sub> 1                       |
| <b>Unit Cell Dimensions</b>                                       |                                            |
| a, b, c (Å)                                                       | 44.75, 131.41, 88.34                       |
| α,β,γ (°)                                                         | 90, 104.30, 90                             |
| <b>Resolution (Å)</b>                                             | 30.00 – 2.00                               |
| <b>Number of unique Reflections</b>                               | 64,702 (2605)                              |
| <b>Completeness (%)</b>                                           | 96.85 (73.00)                              |
| <b>Redundancy</b>                                                 | 4.30 (2.70)                                |
| <b>R<sub>merge</sub><sup>1</sup></b>                              | 0.090 (0.48)                               |
| <b>I/σ(I)</b>                                                     | 22.84(2.2)                                 |
| <b>R<sub>work</sub><sup>2</sup>, R<sub>free</sub><sup>3</sup></b> | 0.18, 0.22                                 |
| <b>Ramachandran Statistics<sup>4</sup> (%)</b>                    |                                            |
| Most Favored                                                      | 96.82                                      |
| Allowed                                                           | 3.18                                       |
| Outliers                                                          | 0                                          |
| <b>Number of atoms</b>                                            |                                            |
| Protein, solvent                                                  | 6287, 431                                  |
| Abacavir                                                          | 42                                         |
| <b>Average B factors (Å<sup>2</sup>)</b>                          |                                            |
| Protein (heavy chain, light chain)                                | 35.45, 33.00                               |
| Waters                                                            | 33.48                                      |
| Pep-V                                                             | 27.51                                      |
| Abacavir                                                          | 21.61                                      |

Values in parentheses are for highest resolution bin.

$$^1R_{\text{merge}} = \frac{\sum |I - \langle I \rangle|}{\sum \langle I \rangle}$$

$$^2R_{\text{work}} = \frac{\sum |F_o(hkl) - |F_c(hkl)||}{\sum |F_o(hkl)|}$$

<sup>3</sup>R<sub>free</sub> is calculated in the same manner based on 10% of the reflection data not used during refinement.

<sup>4</sup>Statistics generated using MOLPROBITY (Chen et al. (2010) *Acta Cryst D* 66:12-21).

**Table S5: List of peptides eluted in the presence and absence of abacavir.**

| Sample | Peptide Sequence* | C-terminus | Length | Accession | Source Protein                                                 | Start | Stop |
|--------|-------------------|------------|--------|-----------|----------------------------------------------------------------|-------|------|
| both   | KTKRISIQF         | F          | 8      | P68366    | Tubulin alpha-4A chain                                         | 336   | 343  |
| both   | RTRIGYSF          | F          | 8      | Q9NYH9    | U3 small nucleolar RNA-associated protein 6 homolog            | 72    | 79   |
| both   | GTHKVTVLF         | F          | 9      | P21333    | Filamin-A                                                      | 352   | 360  |
| both   | HTQKNRQFF         | F          | 9      | O95766    | UPF0550 protein C7orf28                                        | 85    | 93   |
| both   | ISKKINTKF         | F          | 9      | O00232    | 26S proteasome non-ATPase regulatory subunit 12                | 205   | 213  |
| both   | ISNKKEAKF         | F          | 9      | Q9UBU7    | Protein DBF4 homolog A                                         | 87    | 95   |
| both   | ISTPVIRTF         | F          | 9      | Q9NZB2    | Constitutive coactivator of PPAR-gamma-like protein 1          | 989   | 997  |
| both   | ITNKYQLVF         | F          | 9      | Q9NYV6    | RNA polymerase I-specific transcription initiation factor RRN3 | 516   | 524  |
| both   | KAKKEIEKF         | F          | 9      | Q9UHW5    | GPN-loop GTPase 3                                              | 182   | 190  |
| both   | KARQKTNVF         | F          | 9      | Q9ULX3    | RNA-binding protein NOB1                                       | 354   | 362  |
| both   | KSKLSQNNF         | F          | 9      | Q9Y277    | Voltage-dependent anion-selective channel protein 3            | 161   | 169  |
| both   | KSKLTRNNF         | F          | 9      | P45880    | Voltage-dependent anion-selective channel protein 2            | 172   | 180  |
| both   | KSLGVTTKF         | F          | 9      | Q5VWZ2    | Lysophospholipase-like protein 1                               | 195   | 203  |
| both   | KSRELNTRF         | F          | 9      | Q8IXQ4    | Uncharacterized protein KIAA1704                               | 323   | 331  |
| both   | KSRGVLHQF         | F          | 9      | P27144    | Adenylate kinase isoenzyme 4, mitochondrial                    | 186   | 194  |
| both   | KSRVTQSNF         | F          | 9      | P21796    | Voltage-dependent anion-selective channel protein 1            | 161   | 169  |
| both   | KSSDIAKTF         | F          | 9      | P13797    | Plastin-3                                                      | 82    | 90   |
| both   | KSSQVQRRF         | F          | 9      | P13010    | ATP-dependent DNA helicase 2 subunit 2                         | 347   | 355  |
| both   | KSSRKTYTF         | F          | 9      | P52732    | Kinesin-like protein KIF11                                     | 60    | 68   |
| both   | KSTDVAKTF         | F          | 9      | P13796    | Plastin-2                                                      | 82    | 90   |
| both   | KTAPFDSRF         | F          | 9      | P14854    | Cytochrome c oxidase subunit VIb isoform 1                     | 13    | 21   |
| both   | KTKNAVEKF         | F          | 9      | Q7Z7A1    | Centriolin                                                     | 1455  | 1463 |
| both   | KTKQGGLRF         | F          | 9      | Q965Z6    | CDK5 regulatory subunit-associated protein 1                   | 346   | 354  |
| both   | KTKRDINRF         | F          | 9      | Q9HAS0    | Protein Njmu-R1                                                | 238   | 246  |
| both   | KTRTNVPTF         | F          | 9      | Q96BU1    | S100P-binding protein                                          | 305   | 313  |
| both   | KTSGIINKF         | F          | 9      | O95243    | Methyl-CpG-binding domain protein 4                            | 328   | 336  |
| both   | LSSPVTKSF         | F          | 9      | P01834    | Ig kappa chain C region                                        | 93    | 101  |
| both   | RAKPEYHKF         | F          | 9      | Q00341    | Vigilin                                                        | 733   | 741  |
| both   | RARTIYERF         | F          | 9      | Q9BZJ0    | Crooked neck-like protein 1                                    | 361   | 369  |
| both   | RSLRLKQKF         | F          | 9      | Q12788    | WD repeat-containing protein SAZD                              | 208   | 216  |
| both   | RSSGVRSSF         | F          | 9      | Q14667    | UPF0378 protein KIAA0100                                       | 2083  | 2091 |
| both   | RTHPVATSF         | F          | 9      | Q96B26    | Exosome complex exonuclease RRP43                              | 190   | 198  |
| both   | RTKENAEKF         | F          | 9      | Q14894    | Mu-crystallin homolog                                          | 169   | 177  |
| both   | RTKRSSVVF         | F          | 9      | Q92608    | Dedicator of cytokinesis protein 2                             | 1701  | 1709 |
| both   | RTQIRHMKF         | F          | 9      | O95503    | Chromobox protein homolog 6                                    | 221   | 229  |
| both   | RTRKGILLF         | F          | 9      | Q04941    | Proteolipid protein 2                                          | 21    | 29   |
| both   | RTSIVEKRF         | F          | 9      | Q9BXR0    | Queuine tRNA-ribosyltransferase                                | 345   | 353  |
| both   | RTVEKPPKF         | F          | 9      | O15020    | Spectrin beta chain, brain 2                                   | 351   | 359  |
| both   | TTLHQKTF          | F          | 9      | Q13347    | Eukaryotic translation initiation factor 3 subunit 1           | 218   | 226  |
| both   | VSKAPAPTF         | F          | 9      | A6NCL7    | Ankyrin repeat domain-containing protein LOC651746             | 428   | 436  |
| both   | VSKPSAPVF         | F          | 9      | Q69YN4    | Protein virilizer homolog                                      | 76    | 84   |
| both   | VSKRLHQRF         | F          | 9      | Q96ST3    | Paired amphipathic helix protein Sin3a                         | 1202  | 1210 |
| both   | VTHSVRIGF         | F          | 9      | P26010    | Integrin beta-7                                                | 185   | 193  |
| both   | YTYRGPKAF         | F          | 9      | Q12874    | Splicing factor 3A subunit 3                                   | 414   | 422  |
| both   | KAHPPPELKKF       | F          | 10     | P62308    | Small nuclear ribonucleoprotein G                              | 3     | 12   |
| both   | KARREAKVKF        | F          | 10     | P61353    | 60S ribosomal protein L27                                      | 109   | 118  |
| both   | KSRGYVKEQF        | F          | 10     | P46783    | 40S ribosomal protein S10                                      | 53    | 62   |
| both   | KTKDGVREVF        | F          | 10     | P61586    | Transforming protein RhoA                                      | 162   | 171  |
| both   | KTKEGVREVF        | F          | 10     | P08134    | Rho-related GTP-binding protein RhoC                           | 162   | 171  |
| both   | KTKNAQQVHF        | F          | 10     | Q66K89    | Transcription factor E4F1                                      | 529   | 538  |
| both   | KTLDQAIMKF        | F          | 10     | Q92878    | DNA repair protein RAD50                                       | 1126  | 1135 |
| both   | KTLDHTRTHF        | F          | 10     | Q8IZT6    | Abnormal spindle-like microcephaly-associated protein          | 1862  | 1871 |
| both   | KTNEHGMKTF        | F          | 10     | Q562F6    | Shugoshin-like 2                                               | 389   | 398  |
| both   | KTRRPDNTAF        | F          | 10     | Q9NV96    | Cell cycle control protein 50A                                 | 24    | 33   |
| both   | KTVEPTGKRF        | F          | 10     | P10155    | 60 kDa SS-A/Ro ribonucleoprotein                               | 362   | 371  |
| both   | LSKQETGTEF        | F          | 10     | Q15051    | IQ calmodulin-binding motif-containing protein 1               | 261   | 270  |
| both   | LSRPDGSASF        | F          | 10     | Q9NQT4    | Exosome complex exonuclease RRP46                              | 38    | 47   |
| both   | STAKEIIQHF        | F          | 10     | Q9UET6    | Putative ribosomal RNA methyltransferase 1                     | 96    | 105  |
| both   | VTKTVSNDSF        | F          | 10     | P55209    | Nucleosome assembly protein 1-like 1                           | 288   | 297  |
| both   | ITSSIHSKETF       | F          | 11     | Q07864    | DNA polymerase epsilon catalytic subunit A                     | 1890  | 1900 |
| both   | KSKEDLVSQGF       | F          | 11     | Q96FW1    | Ubiquitin thioesterase OTUB1                                   | 120   | 130  |
| both   | KSKPVEKNYAF       | F          | 11     | P09884    | DNA polymerase alpha catalytic subunit                         | 431   | 441  |

| Sample | Peptide Sequence* | C-terminus | Length | Accession | Source Protein                                                   | Start | Stop |
|--------|-------------------|------------|--------|-----------|------------------------------------------------------------------|-------|------|
| both   | KTKSTETEHSF       | F          | 11     | Q9UHC1    | DNA mismatch repair protein Mlh3                                 | 617   | 627  |
| both   | KTLVNPANVTF       | F          | 11     | O75608    | Acyl-protein thioesterase 1                                      | 190   | 200  |
| both   | KTMSAKEKGKF       | F          | 11     | B2RPK0    | Putative high mobility group protein 1-like 1                    | 50    | 60   |
| both   | KTMSAKEKSKF       | F          | 11     | P26583    | 60S ribosomal protein L29                                        | 50    | 60   |
| both   | RTISTASRRHF       | F          | 11     | P14406    | Cytochrome c oxidase polypeptide 7A2, mitochondrial              | 14    | 24   |
| both   | RTNPNSGDFRF       | F          | 11     | Q9NVW2    | E3 ubiquitin-protein ligase RNF12                                | 127   | 137  |
| both   | HSIQYSGEVRFF      | F          | 12     | P04040    | Catalase                                                         | 421   | 432  |
| both   | KARELDPRI         | I          | 9      | Q9ULW0    | Targeting protein for Xklp2                                      | 403   | 411  |
| both   | KSAIPHPLI         | I          | 9      | P61201    | COP9 signalosome complex subunit 2                               | 225   | 233  |
| both   | KSKNILFVI         | I          | 9      | O15069    | NAC-alpha domain-containing protein 1                            | 1439  | 1447 |
| both   | KSKPDKQLI         | I          | 9      | Q03933    | Heat shock factor protein 2                                      | 435   | 443  |
| both   | KSRDYEREI         | I          | 9      | Q9NRZ9    | Lymphoid-specific helicase                                       | 776   | 784  |
| both   | KSVLVKQTI         | I          | 9      | Q9UHX1    | Poly                                                             | 80    | 88   |
| both   | KTAVVVGTI         | I          | 9      | Q07020    | 60S ribosomal protein L18                                        | 78    | 86   |
| both   | KTKGFHTTI         | I          | 9      | Q15417    | Calponin-3                                                       | 130   | 138  |
| both   | KTKKSLESI         | I          | 9      | P62888    | 60S ribosomal protein L30                                        | 6     | 14   |
| both   | KTKPIHTII         | I          | 9      | Q8IWI9    | MAX gene-associated protein                                      | 1032  | 1040 |
| both   | KVRTEKETI         | I          | 9      | P12270    | Nucleoprotein TPR                                                | 1405  | 1413 |
| both   | LSKRNPQRQI        | I          | 9      | P83731    | 60S ribosomal protein L24                                        | 41    | 49   |
| both   | KARLPLRL          | L          | 8      | O00767    | Acyl-CoA desaturase                                              | 129   | 136  |
| both   | AAPEGKRSL         | L          | 9      | Q9Y6B2    | EP300-interacting inhibitor of differentiation 1                 | 67    | 75   |
| both   | HTWNGIRHL         | L          | 9      | Q99643    | Succinate dehydrogenase cytochrome b560 subunit, mitochondrial   | 127   | 135  |
| both   | ISKQFHHQL         | L          | 9      | Q99613    | Eukaryotic translation initiation factor 3 subunit C             | 710   | 718  |
| both   | KTFRIKRFL         | L          | 9      | P62891    | 60S ribosomal protein L39                                        | 5     | 13   |
| both   | KTIKLWNTL         | L          | 9      | P63244    | Guanine nucleotide-binding protein subunit beta-2-like 1         | 127   | 135  |
| both   | KTRMEERRL         | L          | 9      | Q9BY42    | UPF0549 protein C20orf43                                         | 183   | 191  |
| both   | RAREYNARL         | L          | 9      | Q00653    | Nuclear factor NF-kappa-B p100 subunit                           | 442   | 450  |
| both   | RSNRVVRTL         | L          | 9      | Q9Y5Y5    | Peroxisomal membrane protein PEX16                               | 170   | 178  |
| both   | RTKASVHTL         | L          | 9      | O43660    | Pleiotropic regulator 1                                          | 318   | 326  |
| both   | TTSRVLKVL         | L          | 9      | P35222    | Catenin beta-1                                                   | 339   | 347  |
| both   | KTWAGSQSRRRL      | L          | 11     | Q9UI43    | Putative ribosomal RNA methyltransferase 2                       | 194   | 204  |
| both   | RTMSSSDRAMM       | M          | 11     | Q00403    | Transcription initiation factor IIB                              | 105   | 115  |
| both   | KTKDVTVW          | W          | 8      | Q96DR4    | StAR-related lipid transfer protein 4                            | 34    | 41   |
| both   | LSKKSQKW          | W          | 8      | P41236    | Protein phosphatase inhibitor 2                                  | 40    | 47   |
| both   | MAARGHSW          | W          | 8      | Q14213    | Interleukin-27 subunit beta                                      | 70    | 77   |
| both   | VSKVSTTW          | W          | 8      | Q9UKT4    | F-box only protein 5                                             | 274   | 281  |
| both   | VTRKSWLW          | W          | 8      | P82930    | 28S ribosomal protein S34, mitochondrial                         | 80    | 87   |
| both   | VTRQGALW          | W          | 8      | Q55RD1    | Putative mitochondrial import inner membrane translocase subunit | 120   | 127  |
| both   | AAQITQRKW         | W          | 9      | P30504    | HLA class I histocompatibility antigen, Cw-4 alpha chain         | 163   | 171  |
| both   | ASHKGQKLW         | W          | 9      | O15049    | NEDD4-binding protein 3                                          | 135   | 143  |
| both   | ETKKKVFLW         | W          | 9      | A6NDK8    | Protein FAM35B                                                   | 480   | 488  |
| both   | FVKKLEHSW         | W          | 9      | Q99755    | Phosphatidylinositol-4-phosphate 5-kinase type-1 alpha           | 358   | 366  |
| both   | GSKDKNFQW         | W          | 9      | P49792    | E3 SUMO-protein ligase RanBP2                                    | 2864  | 2872 |
| both   | GTDKTLRTW         | W          | 9      | Q9NWT1    | p21-activated protein kinase-interacting protein 1               | 142   | 150  |
| both   | GTLKGHNGW         | W          | 9      | P63244    | Guanine nucleotide-binding protein subunit beta-2-like 1         | 9     | 17   |
| both   | GTLSGHASW         | W          | 9      | Q9GZS3    | WD repeat-containing protein 61                                  | 226   | 234  |
| both   | GTVLKTSSW         | W          | 9      | Q460N5    | Poly [ADP-ribose] polymerase 14                                  | 993   | 1001 |
| both   | GTYGVRAAW         | W          | 9      | P13598    | Intercellular adhesion molecule 2                                | 258   | 266  |
| both   | HSHPHITVW         | W          | 9      | P46736    | BRCA1/BRCA2-containing complex subunit 3                         | 122   | 130  |
| both   | IAAPDSRRW         | W          | 9      | O95297    | Myelin protein zero-like protein 1                               | 11    | 19   |
| both   | IAAQGTTRW         | W          | 9      | Q9BZL1    | Ubiquitin-like protein 5                                         | 31    | 39   |
| both   | ISKEEAMRW         | W          | 9      | P62913    | 60S ribosomal protein L11                                        | 157   | 165  |
| both   | ISSSAGARW         | W          | 9      | Q92673    | Sortilin-related receptor                                        | 522   | 530  |
| both   | ITAGAHRLW         | W          | 9      | O00767    | Acyl-CoA desaturase                                              | 115   | 123  |
| both   | ITKKQVSVW         | W          | 9      | P13196    | 5-aminolevulinate synthase, nonspecific, mitochondrial           | 240   | 248  |
| both   | ITTKAISRW         | W          | 9      | P49368    | T-complex protein 1 subunit gamma                                | 160   | 168  |
| both   | ITYDKLNKW         | W          | 9      | P05120    | Plasminogen activator inhibitor 2                                | 286   | 294  |
| both   | ITYQHIDRW         | W          | 9      | Q9UBQ5    | Eukaryotic translation initiation factor 3 subunit K             | 148   | 156  |
| both   | KAAPRSQHW         | W          | 9      | Q92917    | G patch domain and KOW motifs-containing protein                 | 349   | 357  |
| both   | KAKREVSSW         | W          | 9      | P53582    | Methionine aminopeptidase 1                                      | 59    | 67   |
| both   | KATPIKLIW         | W          | 9      | P49685    | G-protein coupled receptor 15                                    | 187   | 195  |
| both   | KGKPIRIMW         | W          | 9      | Q13310    | Polyadenylate-binding protein 4                                  | 78    | 86   |
| both   | KGKPVIRIMW        | W          | 9      | P11940    | Polyadenylate-binding protein 1                                  | 78    | 86   |

| Sample | Peptide Sequence* | C-terminus | Length | Accession | Source Protein                                                | Start | Stop |
|--------|-------------------|------------|--------|-----------|---------------------------------------------------------------|-------|------|
| both   | KLKDIRNAW         | W          | 9      | Q9UKD2    | mRNA turnover protein 4 homolog                               | 52    | 60   |
| both   | KSFENISKW         | W          | 9      | P61026    | Ras-related protein Rab-10                                    | 95    | 103  |
| both   | KSGSVQEQQW        | W          | 9      | Q9NXF1    | Testis-expressed sequence 10 protein                          | 895   | 903  |
| both   | KSIRNDIEW         | W          | 9      | Q9NPA3    | Mid1-interacting protein 1                                    | 95    | 103  |
| both   | KSKPKNSVW         | W          | 9      | Q92963    | GTP-binding protein Rit1                                      | 196   | 204  |
| both   | KSSLTQHSW         | W          | 9      | Q9NYB0    | Telomeric repeat-binding factor 2-interacting protein 1       | 169   | 177  |
| both   | KTHPLWRLW         | W          | 9      | Q9HBE5    | Interleukin-21 receptor                                       | 256   | 264  |
| both   | KTKETSVNW         | W          | 9      | P55265    | Double-stranded RNA-specific adenosine deaminase              | 1120  | 1128 |
| both   | KTKEVIQEW         | W          | 9      | Q9Y490    | Talin-1                                                       | 343   | 351  |
| both   | KTKEVLQEW         | W          | 9      | Q9Y4G6    | Talin-2                                                       | 346   | 354  |
| both   | KVKEQKDYW         | W          | 9      | Q13137    | Calcium-binding and coiled-coil domain-containing protein 2   | 197   | 205  |
| both   | LA AVRGEQW        | W          | 9      | P13498    | Cytochrome b-245 light chain                                  | 123   | 131  |
| both   | LATTILQHW         | W          | 9      | P78527    | DNA-dependent protein kinase catalytic subunit                | 1618  | 1626 |
| both   | LSGPFVQKW         | W          | 9      | P22102    | Trifunctional purine biosynthetic protein adenosine-3         | 899   | 907  |
| both   | LSQEQLRQW         | W          | 9      | P32248    | C-C chemokine receptor type 7                                 | 347   | 355  |
| both   | LTYENVERW         | W          | 9      | Q15907    | Ras-related protein Rab-11B                                   | 97    | 105  |
| both   | LVRNSHHTW         | W          | 9      | Q9NXG6    | Putative HIF-prolyl hydroxylase PH-4                          | 271   | 279  |
| both   | RADKRVNEW         | W          | 9      | Q15393    | Splicing factor 3B subunit 3                                  | 528   | 536  |
| both   | RAKNVRNDW         | W          | 9      | Q6RFH5    | WD repeat-containing protein 74                               | 169   | 177  |
| both   | RGKAHAAVW         | W          | 9      | O00170    | AH receptor-interacting protein                               | 271   | 279  |
| both   | RSKEESAHW         | W          | 9      | Q9BY42    | UPF0549 protein C20orf43                                      | 290   | 298  |
| both   | RSRSPHRKW         | W          | 9      | Q9NYV4    | Cell division cycle 2-related protein kinase 7                | 219   | 227  |
| both   | RSRSPRERHW        | W          | 9      | Q16560    | U11/U12 small nuclear ribonucleoprotein 35 kDa protein        | 186   | 194  |
| both   | RTVIIQSW          | W          | 9      | P10809    | 60 kDa heat shock protein, mitochondrial                      | 60    | 68   |
| both   | RVAQMKRTW         | W          | 9      | Q8IY37    | Probable ATP-dependent RNA helicase DHX37                     | 835   | 843  |
| both   | RVHPETYEW         | W          | 9      | Q7KZ85    | Transcription elongation factor SPT6                          | 1057  | 1065 |
| both   | SADKTVKWLW        | W          | 9      | Q9Y263    | Phospholipase A-2-activating protein                          | 170   | 178  |
| both   | SADRTVKWLW        | W          | 9      | P57737    | Coronin-7                                                     | 97    | 105  |
| both   | SSEKHAYSW         | W          | 9      | Q8WUM0    | Nuclear pore complex protein Nup133                           | 302   | 310  |
| both   | SSLKKKQIW         | W          | 9      | Q16658    | Fascin                                                        | 38    | 46   |
| both   | SSSKEHVKW         | W          | 9      | P46063    | ATP-dependent DNA helicase Q1                                 | 164   | 172  |
| both   | SSSRIRAAW         | W          | 9      | P14543    | Nidogen-1                                                     | 4     | 12   |
| both   | STKRKAADVW        | W          | 9      | P21359    | Neurofibromin                                                 | 259   | 267  |
| both   | SVKRNQAVW         | W          | 9      | Q6ZNB6    | NF-X1-type zinc finger protein NFXL1                          | 166   | 174  |
| both   | SVTEIQEKW         | W          | 9      | Q9NR30    | Nucleolar RNA helicase 2                                      | 689   | 697  |
| both   | TAKISDFSW         | W          | 9      | Q16576    | Histone-binding protein RBBP7                                 | 373   | 381  |
| both   | TSKITSTAW         | W          | 9      | Q9UKA1    | F-box/LRR-repeat protein 5                                    | 423   | 431  |
| both   | TTFSNSQRW         | W          | 9      | O14966    | Ras-related protein Rab-7L1                                   | 94    | 102  |
| both   | TTSKPVRKW         | W          | 9      | Q8IWZ6    | Bardet-Biedl syndrome 7 protein                               | 222   | 230  |
| both   | VAHTIKQAW         | W          | 9      | Q95460    | Major histocompatibility complex class I-related gene protein | 157   | 165  |
| both   | VARKSEHW          | W          | 9      | Q8TAT5    | Endonuclease VIII-like 3                                      | 313   | 321  |
| both   | VSKTLPSTW         | W          | 9      | Q14677    | Clathrin interactor 1                                         | 469   | 477  |
| both   | VTALAARTW         | W          | 9      | Q9UII2    | ATPase inhibitor, mitochondrial                               | 3     | 11   |
| both   | VTKKTYEIW         | W          | 9      | Q14839    | Chromodomain-helicase-DNA-binding protein 4                   | 1721  | 1729 |
| both   | VTNKSVSVW         | W          | 9      | Q9H974    | Queuine tRNA-ribosyltransferase domain-containing protein 1   | 108   | 116  |
| both   | VTNPHSSQW         | W          | 9      | P24522    | Growth arrest and DNA-damage-inducible protein GADD45 alpha   | 127   | 135  |
| both   | VTYKNVPNW         | W          | 9      | P62826    | GTP-binding nuclear protein Ran                               | 96    | 104  |
| both   | YTDNLVRVW         | W          | 9      | P63244    | Guanine nucleotide-binding protein subunit beta-2-like 1      | 302   | 310  |
| both   | ASDDQTIRVW        | W          | 10     | P53621    | Coatamer subunit alpha                                        | 111   | 120  |
| both   | ASKGREAMEW        | W          | 10     | Q9Y3B1    | Protein slowmo homolog 2                                      | 153   | 162  |
| both   | ATRKHGTDLW        | W          | 10     | Q9NP61    | ADP-ribosylation factor GTPase-activating protein 3           | 124   | 133  |
| both   | AVTALAARTW        | W          | 10     | Q9UII2    | ATPase inhibitor, mitochondrial                               | 2     | 11   |
| both   | ETKGDHPYTW        | W          | 10     | Q9Y570    | Protein phosphatase methylesterase 1                          | 278   | 287  |
| both   | GTDNRNRYW         | W          | 10     | Q9UIG0    | Bromodomain adjacent to zinc finger domain protein 1B         | 904   | 913  |
| both   | HGKPVTVQW         | W          | 10     | Q14137    | Ribosome biogenesis protein BOP1                              | 533   | 542  |
| both   | HSAAHTKLQW        | W          | 10     | Q96MD2    | UPF0536 protein C12orf66                                      | 217   | 226  |
| both   | HSITSDNHKW        | W          | 10     | Q8NEM7    | Protein FAM48A                                                | 178   | 187  |
| both   | HTAPPENKTW        | W          | 10     | Q6N021    | Protein TET2                                                  | 994   | 1003 |
| both   | HTLDDRTQLW        | W          | 10     | Q9BXP5    | Arsenite-resistance protein 2                                 | 529   | 538  |
| both   | IAANEENRW         | W          | 10     | O75368    | SH3 domain-binding glutamic acid-rich-like protein            | 39    | 48   |
| both   | ITAENVAKKW        | W          | 10     | Q9BWD1    | Acetyl-CoA acetyltransferase, cytosolic                       | 162   | 171  |
| both   | ITKADAAEFW        | W          | 10     | Q13191    | E3 ubiquitin-protein ligase CBL-B                             | 173   | 182  |
| both   | ITKEIANEW         | W          | 10     | O75410    | Transforming acidic coiled-coil-containing protein 1          | 615   | 624  |

| Sample | Peptide Sequence* | C-terminus | Length | Accession | Source Protein                                                 | Start | Stop |
|--------|-------------------|------------|--------|-----------|----------------------------------------------------------------|-------|------|
| both   | ITSQDVLHSW        | W          | 10     | P00403    | Cytochrome c oxidase subunit 2                                 | 154   | 163  |
| both   | KAHQVKNHMW        | W          | 10     | P11388    | DNA topoisomerase 2-alpha                                      | 352   | 361  |
| both   | KANEGKKEW         | W          | 10     | Q96K76    | Ubiquitin carboxyl-terminal hydrolase 47                       | 997   | 1006 |
| both   | KAREYSKEGW        | W          | 10     | Q5XKP0    | Protein QIL1                                                   | 101   | 110  |
| both   | KARVETQNHW        | W          | 10     | P28066    | Proteasome subunit alpha type-5                                | 91    | 100  |
| both   | KAVIDLNNRW        | W          | 10     | Q01081    | Splicing factor U2AF 35 kDa subunit                            | 125   | 134  |
| both   | KGFSEEHNTW        | W          | 10     | P45973    | Chromobox protein homolog 5                                    | 42    | 51   |
| both   | KSAEKEISLW        | W          | 10     | P22392    | Nucleoside diphosphate kinase B                                | 124   | 133  |
| both   | KSGPVVSLGW        | W          | 10     | Q9H269    | Vacuolar protein sorting-associated protein 16 homolog         | 82    | 91   |
| both   | KSKGSQTEEW        | W          | 10     | Q14202    | Zinc finger MYM-type protein 3                                 | 851   | 860  |
| both   | KSSIHDARSW        | W          | 10     | Q8N2I9    | Serine/threonine-protein kinase 40                             | 389   | 398  |
| both   | KTEASETRKW        | W          | 10     | Q1ED39    | Protein C16orf88                                               | 345   | 354  |
| both   | KTNIQKEATW        | W          | 10     | A8MYJ9    | Importin subunit alpha-2-like protein                          | 109   | 118  |
| both   | KTQTPNRKEW        | W          | 10     | P09874    | Poly [ADP-ribose] polymerase 1                                 | 324   | 333  |
| both   | KVAKEAANRW        | W          | 10     | Q9BWT6    | Meiotic nuclear division protein 1 homolog                     | 160   | 169  |
| both   | MTAGVDGHSW        | W          | 10     | O75694    | Nuclear pore complex protein Nup155                            | 450   | 459  |
| both   | RAKTDSAEKW        | W          | 10     | Q15058    | Kinesin-like protein KIF14                                     | 124   | 133  |
| both   | RALELEARRW        | W          | 10     | Q03169    | Tumor necrosis factor, alpha-induced protein 2                 | 334   | 343  |
| both   | RATQSGQRRW        | W          | 10     | Q5SXM2    | snRNA-activating protein complex subunit 4                     | 722   | 731  |
| both   | RQNPHHVHEW        | W          | 10     | Q9HCS7    | Pre-mRNA-splicing factor SYF1                                  | 351   | 360  |
| both   | RSFKETTNRW        | W          | 10     | Q92613    | Protein Jade-3                                                 | 714   | 723  |
| both   | RSQKAEGQRW        | W          | 10     | O15533    | Tapasin                                                        | 339   | 348  |
| both   | RSRDISREEW        | W          | 10     | Q9ULV3    | Cip1-interacting zinc finger protein                           | 767   | 776  |
| both   | RSYSESEKQW        | W          | 10     | Q96HQ2    | CDKN2AIP N-terminal-like protein                               | 28    | 37   |
| both   | RTAGHPLTRW        | W          | 10     | P35236    | Tyrosine-protein phosphatase non-receptor type 7               | 76    | 85   |
| both   | RTLVDNNTW         | W          | 10     | P46977    | Dolichyl-diphosphooligosaccharide--protein glycosyltransferase | 538   | 547  |
| both   | RTTLVDNNTW        | W          | 10     | Q8TCJ2    | Dolichyl-diphosphooligosaccharide--protein glycosyltransferase | 617   | 626  |
| both   | RVKPLHYSW         | W          | 10     | O43847    | Nardilysin                                                     | 453   | 462  |
| both   | RVKSVNLDQW        | W          | 10     | Q8IYB5    | Stromal membrane-associated protein 1                          | 69    | 78   |
| both   | SAASPHYQEW        | W          | 10     | Q6SPF0    | Atherin                                                        | 25    | 34   |
| both   | SATDAAIRVW        | W          | 10     | Q12788    | WD repeat-containing protein SAZD                              | 57    | 66   |
| both   | TAAQITQRKW        | W          | 10     | P30480    | HLA class I histocompatibility antigen, B-2 alpha chain        | 162   | 171  |
| both   | TSSKPDPSQW        | W          | 10     | O75410    | Transforming acidic coiled-coil-containing protein 1           | 380   | 389  |
| both   | TVYTGIDHHW        | W          | 10     | Q9NV06    | WD repeat and SOF domain-containing protein 1                  | 157   | 166  |
| both   | VTNKSQLRTW        | W          | 10     | P27694    | Replication protein A 70 kDa DNA-binding subunit               | 203   | 212  |
| both   | VTVPANVQRW        | W          | 10     | Q13155    | Multisynthetase complex auxiliary component p38                | 293   | 302  |
| both   | AAPFAEKESEW       | W          | 11     | Q9BRF8    | Uncharacterized metallophosphoesterase CSTP1                   | 19    | 29   |
| both   | ASYSGKAADVW       | W          | 11     | Q96RU7    | Tribbles homolog 3                                             | 235   | 245  |
| both   | GTWIGKTERW        | W          | 11     | Q9C0C9    | Ubiquitin-conjugating enzyme E2 O                              | 1045  | 1055 |
| both   | GYMGHTGAVW        | W          | 11     | Q13347    | Eukaryotic translation initiation factor 3 subunit I           | 46    | 56   |
| both   | HSNEQTLQRSW       | W          | 11     | Q9Y6J8    | Serine/threonine/tyrosine-interacting-like protein 1           | 263   | 273  |
| both   | HTNQDHHVAVW       | W          | 11     | Q9UNY4    | Transcription termination factor 2                             | 526   | 536  |
| both   | KASSEVERQRW       | W          | 11     | P22059    | Oxysterol-binding protein 1                                    | 162   | 172  |
| both   | KIRsPGKNHKW       | W          | 11     | Q9UHK0    | Nuclear fragile X mental retardation-interacting protein 1     | 289   | 299  |
| both   | KSKAMTGVQEW       | W          | 11     | P49368    | T-complex protein 1 subunit gamma                              | 425   | 435  |
| both   | KSKLDAEVSKW       | W          | 11     | P35221    | Catenin alpha-1                                                | 695   | 705  |
| both   | KTVDGPSGKLW       | W          | 11     | P04406    | Glyceraldehyde-3-phosphate dehydrogenase                       | 186   | 196  |
| both   | KVARDQAVKKW       | W          | 11     | O75792    | Ribonuclease H2 subunit A                                      | 183   | 193  |
| both   | KVIHEQVNHHRW      | W          | 11     | P11388    | DNA topoisomerase 2-alpha                                      | 287   | 297  |
| both   | QTDPSGTYHAW       | W          | 11     | Q8TAA3    | Proteasome subunit alpha type-7-like                           | 154   | 164  |
| both   | RALEAEKRALW       | W          | 11     | Q14160    | Protein LAP4                                                   | 1491  | 1501 |
| both   | RARLEESRRLW       | W          | 11     | Q01082    | Spectrin beta chain, brain 1                                   | 631   | 641  |
| both   | RTIQTPIGSTW       | W          | 11     | Q9BVJ6    | U3 small nucleolar RNA-associated protein 14 homolog A         | 697   | 707  |
| both   | RVFEDESGKHW       | W          | 11     | Q8TEA8    | D-tyrosyl-tRNA                                                 | 53    | 63   |
| both   | RVRAGPKKESW       | W          | 11     | Q96GQ5    | UPF0420 protein C16orf58                                       | 407   | 417  |
| both   | SASPDATIRIW       | W          | 11     | Q9UMS4    | Pre-mRNA-processing factor 19                                  | 281   | 291  |
| both   | SSATDAAIRVW       | W          | 11     | Q12788    | WD repeat-containing protein SAZD                              | 56    | 66   |
| both   | TGSTDKTVRLW       | W          | 11     | O75529    | TAF5-like RNA polymerase II p300/CBP-associated factor         | 443   | 453  |
| both   | TSRPPAQGASW       | W          | 11     | O14976    | Cyclin G-associated kinase                                     | 1121  | 1131 |
| both   | VAKKTKDVTYW       | W          | 11     | Q96DR4    | StAR-related lipid transfer protein 4                          | 31    | 41   |
| both   | VGLPAAGKTTW       | W          | 11     | Q9BUJ2    | Heterogeneous nuclear ribonucleoprotein U-like protein 1       | 427   | 437  |
| both   | VVSPHEDMRTW       | W          | 11     | P42345    | FKBP12-rapamycin complex-associated protein                    | 1643  | 1653 |
| both   | RSKDDPGKGSYW      | W          | 12     | Q9UPW0    | Forkhead box protein J3                                        | 141   | 152  |

| Sample  | Peptide Sequence* | C-terminus | Length | Accession | Source Protein                                                 | Start | Stop |
|---------|-------------------|------------|--------|-----------|----------------------------------------------------------------|-------|------|
| both    | RTKANEGKKETW      | W          | 12     | Q96K76    | Ubiquitin carboxyl-terminal hydrolase 47                       | 995   | 1006 |
| both    | RTLDEAVGVQKW      | W          | 12     | Q14667    | UPF0378 protein KIAA0100                                       | 836   | 847  |
| both    | VSDSGAHLNSW       | W          | 12     | Q9NVM9    | Uncharacterized protein C12orf11                               | 80    | 91   |
| both    | KVKDGGPGGKEATW    | W          | 13     | P22307    | Non-specific lipid-transfer protein                            | 462   | 474  |
| both    | KARNSFRY          | Y          | 8      | P46779    | 60S ribosomal protein L28                                      | 33    | 40   |
| both    | HTRSDVRLY         | Y          | 9      | Q86T12    | Dipeptidyl peptidase 9                                         | 614   | 622  |
| both    | ISKALVAYY         | Y          | 9      | P62249    | 40S ribosomal protein S16                                      | 88    | 96   |
| both    | KAAEMRRIY         | Y          | 9      | Q9NUP1    | Protein cappuccino homolog                                     | 124   | 132  |
| both    | KASGTLREY         | Y          | 9      | Q02543    | 60S ribosomal protein L18a                                     | 2     | 10   |
| both    | KSFVKVYNY         | Y          | 9      | P61353    | 60S ribosomal protein L27                                      | 69    | 77   |
| both    | KSKITHPVY         | Y          | 9      | Q9UGP8    | Translocation protein SEC63 homolog                            | 631   | 639  |
| both    | KSRRDTPKY         | Y          | 9      | Q9Y2X3    | Nucleolar protein 5                                            | 330   | 338  |
| both    | KTAGKRYVY         | Y          | 9      | P14921    | Protein C-ets-1                                                | 404   | 412  |
| both    | KTFPYQHRY         | Y          | 9      | Q8NI27    | THO complex subunit 2                                          | 398   | 406  |
| both    | KTKEIEQVY         | Y          | 9      | Q8NEY8    | Periphilin-1                                                   | 297   | 305  |
| both    | KTKFPAEQY         | Y          | 9      | Q15631    | Translin                                                       | 76    | 84   |
| both    | KTNQLHRMY         | Y          | 9      | Q9UBI1    | COMM domain-containing protein 3                               | 137   | 145  |
| both    | KTRIIDVVY         | Y          | 9      | P62241    | 40S ribosomal protein S8                                       | 75    | 83   |
| both    | LAKTGVHHY         | Y          | 9      | P62888    | 60S ribosomal protein L30                                      | 66    | 74   |
| both    | LVKREDYLY         | Y          | 9      | O95298    | NADH dehydrogenase [ubiquinone] 1 subunit C2                   | 74    | 82   |
| both    | MTNPHNHLY         | Y          | 9      | Q15006    | Tetratricopeptide repeat protein 35                            | 183   | 191  |
| both    | RSQVQRARY         | Y          | 9      | P60900    | Proteasome subunit alpha type-6                                | 88    | 96   |
| both    | RSRRDELHY         | Y          | 9      | Q9Y5W7    | Sorting nexin-14                                               | 184   | 192  |
| both    | RTIVIRRDY         | Y          | 9      | P62280    | 40S ribosomal protein S11                                      | 84    | 92   |
| both    | RVKQEEQRY         | Y          | 9      | O75410    | Transforming acidic coiled-coil-containing protein 1           | 722   | 730  |
| both    | RVRDVTYKY         | Y          | 9      | Q12931    | Heat shock protein 75 kDa, mitochondrial                       | 269   | 277  |
| both    | HTFQNDIHVY        | Y          | 10     | Q15392    | 24-dehydrocholesterol reductase                                | 399   | 408  |
| both    | KIYPGHRRY         | Y          | 10     | P83731    | 60S ribosomal protein L24                                      | 12    | 21   |
| both    | KSFSESGINY        | Y          | 10     | O60762    | Dolichol-phosphate mannosyltransferase                         | 49    | 58   |
| both    | KTAVIDHHNY        | Y          | 10     | P39656    | Dolichyl-diphosphooligosaccharide--protein glycosyltransferase | 136   | 145  |
| both    | KTKEVIGTGY        | Y          | 10     | Q9BT09    | Protein canopy homolog 3                                       | 68    | 77   |
| both    | KTLPADVQNY        | Y          | 10     | Q99590    | SFRS2-interacting protein                                      | 837   | 846  |
| both    | KSKPKQLIQY        | Y          | 11     | Q03933    | Heat shock factor protein 2                                    | 435   | 445  |
| both    | KTLPETSLPNY       | Y          | 11     | Q9BYI3    | Hyccin                                                         | 17    | 27   |
| both    | RTKKVGIVGKY       | Y          | 11     | P61513    | Outer dense fiber protein 2                                    | 4     | 14   |
| both    | DGSSLPADVHRY      | Y          | 12     | Q96KA5    | Cleft lip and palate transmembrane protein 1-like protein      | 186   | 197  |
| treated | RSVALAVLA         | A          | 9      | P61769    | Beta-2-microglobulin                                           | 3     | 11   |
| treated | ATHPSRAQF         | F          | 9      | O95834    | Echinoderm microtubule-associated protein-like 2               | 384   | 392  |
| treated | HSNPEPKTF         | F          | 9      | Q9NS87    | Kinesin-like protein KIF15                                     | 62    | 70   |
| treated | KSKENPRNF         | F          | 9      | P37802    | Transgelin-2                                                   | 154   | 162  |
| treated | KSVKKGFEF         | F          | 9      | Q15019    | Septin-2                                                       | 30    | 38   |
| treated | KSYGNEKRF         | F          | 9      | Q06330    | Recombining binding protein suppressor of hairless             | 58    | 66   |
| treated | KVAEVTKKF         | F          | 9      | P35914    | Hydroxymethylglutaryl-CoA lyase, mitochondrial                 | 184   | 192  |
| treated | RSKTVYEGF         | F          | 9      | Q9NW38    | E3 ubiquitin-protein ligase FANCL                              | 20    | 28   |
| treated | RSQQNRHSF         | F          | 9      | O76039    | Cyclin-dependent kinase-like 5                                 | 439   | 447  |
| treated | RSYEEKKQF         | F          | 9      | Q6IQ32    | ADNP homeobox protein 2                                        | 1049  | 1057 |
| treated | RTATFQQRF         | F          | 9      | Q9BY77    | Polymerase delta-interacting protein 3                         | 46    | 54   |
| treated | RTHTGEKKF         | F          | 9      | Q13118    | Krueppel-like factor 10                                        | 421   | 429  |
| treated | RTHTGEKRF         | F          | 9      | Q8TD94    | Krueppel-like factor 14                                        | 247   | 255  |
| treated | RTKDILIRF         | F          | 9      | Q68CP4    | Heparan-alpha-glucosaminide N-acetyltransferase                | 527   | 535  |
| treated | RTKQVLHTF         | F          | 9      | Q9BTV5    | Fibronectin type III and SPRY domain-containing protein 1      | 439   | 447  |
| treated | RVAQKKASF         | F          | 9      | P46777    | 60S ribosomal protein L5                                       | 279   | 287  |
| treated | SSRRKQLTF         | F          | 9      | Q8WTV1    | THAP domain-containing protein 3                               | 15    | 23   |
| treated | STTDVEKSF         | F          | 9      | Q53EL6    | Programmed cell death protein 4                                | 232   | 240  |
| treated | VAKKIHEEF         | F          | 9      | Q9Y2L1    | Exosome complex exonuclease RRP44                              | 674   | 682  |
| treated | VSKSVTQGF         | F          | 9      | Q92599    | Septin-8                                                       | 35    | 43   |
| treated | HSGDHGKRLF        | F          | 10     | O43674    | NADH dehydrogenase] 1 beta subcomplex subunit 5, mitochondrial | 46    | 55   |
| treated | KSSSHERRAF        | F          | 10     | P51532    | Probable global transcription activator SNF2L4                 | 1237  | 1246 |
| treated | KTKSENGLEF        | F          | 10     | P21796    | Voltage-dependent anion-selective channel protein 1            | 32    | 41   |
| treated | KTMKMRGQAF        | F          | 10     | P08579    | U2 small nuclear ribonucleoprotein B''                         | 44    | 53   |
| treated | KTRSTKDQQF        | F          | 10     | O75044    | SLIT-ROBO Rho GTPase-activating protein 2                      | 77    | 86   |
| treated | RSDTSDKRKF        | F          | 10     | P20591    | Interferon-induced GTP-binding protein Mx1                     | 633   | 642  |
| treated | RTKQQREAEF        | F          | 10     | Q15005    | Signal peptidase complex subunit 2                             | 180   | 189  |

| Sample  | Peptide Sequence* | C-terminus | Length | Accession | Source Protein                                                 | Start | Stop |
|---------|-------------------|------------|--------|-----------|----------------------------------------------------------------|-------|------|
| treated | KSRKEQKETT        | F          | 11     | P35408    | Prostaglandin E2 receptor EP4 subtype                          | 44    | 54   |
| treated | KSRPEDQRSSF       | F          | 11     | Q9UPZ3    | Hermansky-Pudlak syndrome 5 protein                            | 899   | 909  |
| treated | KSRSSRAGLQF       | F          | 11     | Q8IU66    | Histone H2A type 2-B                                           | 16    | 26   |
| treated | KTRSKGRNEQF       | F          | 11     | O75691    | Small subunit processome component 20 homolog                  | 484   | 494  |
| treated | RSRPQKHQNTF       | F          | 11     | Q96MD7    | Uncharacterized protein C9orf85                                | 10    | 20   |
| treated | KSYKGRQI          | I          | 8      | Q14683    | Structural maintenance of chromosomes protein 1A               | 13    | 20   |
| treated | RTKKPVVI          | I          | 8      | Q9NSE4    | Isoleucyl-tRNA synthetase, mitochondrial                       | 468   | 475  |
| treated | ASVGDRVTI         | I          | 9      | P04432    | Ig kappa chain V-I region Daudi                                | 35    | 43   |
| treated | ATIDKVVKI         | I          | 9      | Q13535    | Serine/threonine-protein kinase ATR                            | 561   | 569  |
| treated | AVITNQPEI         | I          | 9      | P25963    | NF-kappa-B inhibitor alpha                                     | 118   | 126  |
| treated | GTHVGKVINI        | I          | 9      | Q9GZ53    | WD repeat-containing protein 61                                | 124   | 132  |
| treated | ISIKQEPKI         | I          | 9      | Q96CB8    | Integrator complex subunit 12                                  | 65    | 73   |
| treated | ITKTVVENI         | I          | 9      | P57740    | Nuclear pore complex protein Nup107                            | 635   | 643  |
| treated | KAIHNKVNI         | I          | 9      | Q15019    | Septin-2                                                       | 169   | 177  |
| treated | KAYSEAHEI         | I          | 9      | P61981    | 14-3-3 protein gamma                                           | 152   | 160  |
| treated | KSATKQPSI         | I          | 9      | O94782    | Ubiquitin carboxyl-terminal hydrolase 1                        | 343   | 351  |
| treated | KSIKNIQKI         | I          | 9      | P36542    | ATP synthase subunit gamma, mitochondrial                      | 36    | 44   |
| treated | KSKSEIKI          | I          | 9      | Q96CS2    | Coiled-coil domain-containing protein 5                        | 130   | 138  |
| treated | KTFTTQETI         | I          | 9      | P06744    | Glucose-6-phosphate isomerase                                  | 211   | 219  |
| treated | KTIAEGRRI         | I          | 9      | P09132    | Signal recognition particle 19 kDa protein                     | 27    | 35   |
| treated | KTIDGQQTI         | I          | 9      | P52907    | F-actin-capping protein subunit alpha-1                        | 146   | 154  |
| treated | KTKDGVVEI         | I          | 9      | P04792    | Heat shock protein beta-1                                      | 112   | 120  |
| treated | KTKVQEEKI         | I          | 9      | Q8TCG1    | Protein CIP2A                                                  | 807   | 815  |
| treated | KTKVQKDEI         | I          | 9      | Q72333    | Probable helicase senataxin                                    | 779   | 787  |
| treated | KTSGSNVVI         | I          | 9      | P56381    | ATP synthase subunit epsilon, mitochondrial                    | 37    | 45   |
| treated | MQNPRQYKI         | I          | 9      | P62269    | 40S ribosomal protein S18                                      | 71    | 79   |
| treated | NLPTKETI          | I          | 9      | P63313    | Thymosin beta-10                                               | 27    | 35   |
| treated | NTVELRVKI         | I          | 9      | P04844    | Dolichyl-diphosphooligosaccharide--protein glycosyltransferase | 361   | 369  |
| treated | QVFKGAVKI         | I          | 9      | P37268    | Squalene synthetase                                            | 308   | 316  |
| treated | RSMQNSPSI         | I          | 9      | Q8N201    | Integrator complex subunit 1                                   | 2109  | 2117 |
| treated | RTQHVKVVI         | I          | 9      | Q9BZJ0    | Crooked neck-like protein 1                                    | 705   | 713  |
| treated | RTVKDAHSI         | I          | 9      | Q8NAV1    | Pre-mRNA-splicing factor 38A                                   | 4     | 12   |
| treated | SSAKIVPKI         | I          | 9      | Q72417    | Nuclear fragile X mental retardation-interacting protein 2     | 348   | 356  |
| treated | STTRVKPFI         | I          | 9      | Q9Y6A4    | UPF0468 protein C16orf80                                       | 110   | 118  |
| treated | SVAQVKAMI         | I          | 9      | O15205    | Ubiquitin D                                                    | 111   | 119  |
| treated | VGARIYHTI         | I          | 9      | P10620    | Microsomal glutathione S-transferase 1                         | 111   | 119  |
| treated | VSTGLKVRI         | I          | 9      | P13639    | Elongation factor 2                                            | 421   | 429  |
| treated | VTGVTRVTI         | I          | 9      | Q9H009    | Nascent polypeptide-associated complex subunit alpha-2         | 88    | 96   |
| treated | GTASVHKVTI        | I          | 10     | O60244    | Mediator of RNA polymerase II transcription subunit 14         | 350   | 359  |
| treated | KAERERGITI        | I          | 10     | P68104    | Elongation factor 1-alpha 1                                    | 64    | 73   |
| treated | KSAPELKTGI        | I          | 10     | P19338    | Nucleolin                                                      | 318   | 327  |
| treated | KSYEAQDPEI        | I          | 10     | Q99622    | Protein C10                                                    | 86    | 95   |
| treated | KTYQDIQNTI        | I          | 10     | P24928    | DNA-directed RNA polymerase II subunit RPB1                    | 697   | 706  |
| treated | LTTKLTNTNI        | I          | 10     | P00403    | Cytochrome c oxidase subunit 2                                 | 46    | 55   |
| treated | RGVPDAKIRI        | I          | 10     | P27635    | 60S ribosomal protein L10                                      | 24    | 33   |
| treated | RVAQLEQVYI        | I          | 10     | P62318    | Small nuclear ribonucleoprotein Sm D3                          | 54    | 63   |
| treated | TTVEDLGSKI        | I          | 10     | P35613    | Basigin                                                        | 144   | 153  |
| treated | KAISNKDQHSI       | I          | 11     | Q96FA3    | Protein pellino homolog 1                                      | 67    | 77   |
| treated | KTFEEKQGTEI       | I          | 11     | P19338    | Nucleolin                                                      | 444   | 454  |
| treated | VTYPAKAKGTFI      | I          | 12     | P04844    | Dolichyl-diphosphooligosaccharide--protein glycosyltransferase | 396   | 407  |
| treated | KSRESYVL          | L          | 8      | Q14249    | Endonuclease G, mitochondrial                                  | 76    | 83   |
| treated | RSKKAHVL          | L          | 8      | P35221    | Catenin alpha-1                                                | 54    | 61   |
| treated | ITAHVEPLL         | L          | 9      | Q15306    | Interferon regulatory factor 4                                 | 401   | 409  |
| treated | KAASVRPVL         | L          | 9      | Q9H269    | Vacuolar protein sorting-associated protein 16 homolog         | 58    | 66   |
| treated | KAKPVTTNL         | L          | 9      | Q8N0T1    | Uncharacterized protein C8orf59                                | 28    | 36   |
| treated | KAVSLQRKL         | L          | 9      | Q14966    | Zinc finger protein 638                                        | 658   | 666  |
| treated | KSMSGRQKL         | L          | 9      | O15212    | Prefoldin subunit 6                                            | 25    | 33   |
| treated | KSRKNNYGL         | L          | 9      | O76021    | Ribosomal L1 domain-containing protein 1                       | 48    | 56   |
| treated | KTFRDKNL          | L          | 9      | Q9NRM2    | Zinc finger protein 277                                        | 219   | 227  |
| treated | KTFVQKQTL         | L          | 9      | Q8N1W2    | Zinc finger protein 710                                        | 526   | 534  |
| treated | KTKAAVVTL         | L          | 9      | Q8IZT6    | Abnormal spindle-like microcephaly-associated protein          | 2019  | 2027 |
| treated | KVIEINPYL         | L          | 9      | P28074    | Proteasome subunit beta type-5                                 | 92    | 100  |
| treated | LAPERRSTL         | L          | 9      | Q9NX31    | Uncharacterized protein C20orf111                              | 226   | 234  |



| Sample  | Peptide Sequence* | C-terminus | Length | Accession | Source Protein                                               | Start | Stop |
|---------|-------------------|------------|--------|-----------|--------------------------------------------------------------|-------|------|
| treated | LSKPNPPSL         | L          | 9      | Q9UJK3    | Poly [ADP-ribose] polymerase 4                               | 364   | 372  |
| treated | LTKKSETL          | L          | 9      | P09543    | 2',3'-cyclic-nucleotide 3'-phosphodiesterase                 | 194   | 202  |
| treated | QSAKTQIKL         | L          | 9      | O60343    | TBC1 domain family member 4                                  | 444   | 452  |
| treated | QTKRVKANL         | L          | 9      | P35579    | Myosin-9                                                     | 1207  | 1215 |
| treated | RSRTIVHTL         | L          | 9      | Q9NWU5    | 39S ribosomal protein L22, mitochondrial                     | 198   | 206  |
| treated | RSTQVKKQL         | L          | 9      | O60281    | Zinc finger protein 292                                      | 1247  | 1255 |
| treated | RTAQKTALL         | L          | 9      | Q9BVM2    | Protein DPCD                                                 | 11    | 19   |
| treated | SAPSRATAL         | L          | 9      | Q6PI47    | BTB/POZ domain-containing protein KCTD18                     | 326   | 334  |
| treated | STIRLLTSL         | L          | 9      | P49368    | T-complex protein 1 subunit gamma                            | 458   | 466  |
| treated | STLHLVLR          | L          | 9      | P62988    | Ubiquitin                                                    | 65    | 73   |
| treated | KTKADGSFRL        | L          | 10     | Q5JPE7    | Nodal modulator 2                                            | 358   | 367  |
| treated | VTATDIRVTL        | L          | 10     | P11047    | Laminin subunit gamma-1                                      | 244   | 253  |
| treated | KSKDIVNKM         | M          | 9      | P52732    | Kinesin-like protein KIF11                                   | 757   | 765  |
| treated | KSKNILVRM         | M          | 9      | O75394    | 39S ribosomal protein L33, mitochondrial                     | 12    | 20   |
| treated | QTARQHPKM         | M          | 9      | P01374    | Lymphotoxin-alpha                                            | 46    | 54   |
| treated | STRKIHTTM         | M          | 9      | Q9H6R4    | Nucleolar protein 6                                          | 361   | 369  |
| treated | RAFHHGRFIM        | M          | 10     | Q14534    | Squalene monooxygenase                                       | 222   | 231  |
| treated | RTAKGEKFVM        | M          | 10     | P30101    | Protein disulfide-isomerase A3                               | 329   | 338  |
| treated | KSHSHPSRRM        | M          | 11     | Q9UQ35    | Serine/arginine repetitive matrix protein 2                  | 471   | 481  |
| treated | ASANLRVLV         | V          | 9      | Q8WW24    | Tektin-4                                                     | 262   | 270  |
| treated | ATIKLQSTV         | V          | 9      | Q8IZT6    | Abnormal spindle-like microcephaly-associated protein        | 1681  | 1689 |
| treated | HSIPVTVEV         | V          | 9      | Q9UQL6    | Histone deacetylase 5                                        | 26    | 34   |
| treated | KAARIRVSV         | V          | 9      | Q6P1K8    | General transcription factor IIH subunit 2-like protein      | 190   | 198  |
| treated | KIYEGQVEV         | V          | 9      | P46777    | 60S ribosomal protein L5                                     | 117   | 125  |
| treated | KSNGTIIHV         | V          | 9      | P10747    | T-cell-specific surface glycoprotein CD28                    | 127   | 135  |
| treated | KTIHLTLKV         | V          | 9      | O15205    | Ubiquitin D                                                  | 72    | 80   |
| treated | KVAKVEPAV         | V          | 9      | Q9P2E9    | Ribosome-binding protein 1                                   | 145   | 153  |
| treated | RSARVTVAV         | V          | 9      | Q9UDX5    | Mitochondrial fission protein MTP18                          | 73    | 81   |
| treated | RTFHHGVRV         | V          | 9      | Q8NFH4    | Nucleoporin Nup37                                            | 67    | 75   |
| treated | RTLAEIAKV         | V          | 9      | Q15233    | Non-POU domain-containing octamer-binding protein            | 119   | 127  |
| treated | RTTETQVLV         | V          | 9      | P12081    | Histidyl-tRNA synthetase, cytoplasmic                        | 405   | 413  |
| treated | RVAGIHKV          | V          | 9      | P26373    | 60S ribosomal protein L13                                    | 82    | 90   |
| treated | TVAPFNPTV         | V          | 9      | Q96BU1    | S100P-binding protein                                        | 147   | 155  |
| treated | VTTDIQVKV         | V          | 9      | O00267    | Transcription elongation factor SPT5                         | 980   | 988  |
| treated | ATKRAQAW          | W          | 8      | P51149    | Ras-related protein Rab-7a                                   | 135   | 142  |
| treated | HSARSHKW          | W          | 8      | Q6ZNA4    | E3 ubiquitin-protein ligase Arkadia                          | 177   | 184  |
| treated | KSKNSIQW          | W          | 8      | Q15329    | Transcription factor E2F5                                    | 107   | 114  |
| treated | KSKSETRW          | W          | 8      | Q9Y520    | BAT2 domain-containing protein 1                             | 986   | 993  |
| treated | KTTVHRKW          | W          | 8      | P46063    | ATP-dependent DNA helicase Q1                                | 353   | 360  |
| treated | LTNKGHKW          | W          | 8      | Q9Y222    | Cyclin-D-binding Myb-like transcription factor 1             | 144   | 151  |
| treated | QSRRPSSW          | W          | 8      | Q13526    | Peptidyl-prolyl cis-trans isomerase NIMA-interacting 1       | 66    | 73   |
| treated | RSKKAVDW          | W          | 8      | Q8WUM9    | Sodium-dependent phosphate transporter 1                     | 637   | 644  |
| treated | STKESPRW          | W          | 8      | Q9Y561    | Low-density lipoprotein receptor-related protein 12          | 6     | 13   |
| treated | AANHVKVAKW        | W          | 9      | Q9NR09    | Baculoviral IAP repeat-containing protein 6                  | 180   | 188  |
| treated | ASKVTEQEW         | W          | 9      | P09497    | Clathrin light chain B                                       | 120   | 128  |
| treated | ATDAAIRVW         | W          | 9      | Q12788    | WD repeat-containing protein SAZD                            | 58    | 66   |
| treated | ATSRGAAGW         | W          | 9      | Q8WY91    | THAP domain-containing protein 4                             | 119   | 127  |
| treated | ATVTIQRHW         | W          | 9      | Q8IZT6    | Abnormal spindle-like microcephaly-associated protein        | 1396  | 1404 |
| treated | GTNAKVRTW         | W          | 9      | Q9H0H0    | Integrator complex subunit 2                                 | 308   | 316  |
| treated | HARGSSRSW         | W          | 9      | Q9HCU9    | Breast cancer metastasis-suppressor 1                        | 186   | 194  |
| treated | HATGHHYTW         | W          | 9      | P22059    | Oxysterol-binding protein 1                                  | 567   | 575  |
| treated | HSRQGSDEW         | W          | 9      | Q5PRF9    | Sterile alpha motif domain-containing protein 4B             | 167   | 175  |
| treated | HSRrSPQW          | W          | 9      | Q9UQ35    | Serine/arginine repetitive matrix protein 2                  | 505   | 513  |
| treated | HTSTSKRHW         | W          | 9      | Q4ZIN3    | Membralin                                                    | 396   | 404  |
| treated | ISKRLGKRW         | W          | 9      | P35716    | Transcription factor SOX-11                                  | 79    | 87   |
| treated | KAAEKKARW         | W          | 9      | Q8IV08    | Phospholipase D3                                             | 30    | 38   |
| treated | KAGPGLKRW         | W          | 9      | Q96N66    | Membrane-bound O-acyltransferase domain-containing protein 7 | 24    | 32   |
| treated | KAGQVVTIW         | W          | 9      | P02545    | Lamin-A/C                                                    | 490   | 498  |
| treated | KAKVTGDEW         | W          | 9      | P13807    | Glycogen [starch] synthase, muscle                           | 50    | 58   |
| treated | KAVARRKNW         | W          | 9      | O75821    | Eukaryotic translation initiation factor 3 subunit G         | 94    | 102  |
| treated | KLQEKARKW         | W          | 9      | Q6P2Q9    | Pre-mRNA-processing-splicing factor 8                        | 29    | 37   |
| treated | KSAKNPERW         | W          | 9      | Q96P70    | Importin-9                                                   | 900   | 908  |
| treated | KSFDNIRNW         | W          | 9      | P61006    | Ras-related protein Rab-8A                                   | 94    | 102  |

| Sample  | Peptide Sequence* | C-terminus | Length | Accession | Source Protein                                                    | Start | Stop |
|---------|-------------------|------------|--------|-----------|-------------------------------------------------------------------|-------|------|
| treated | KSKKREERW         | W          | 9      | Q727A1    | Centriolin                                                        | 1336  | 1344 |
| treated | KSNPKNSDW         | W          | 9      | Q96PP9    | Guanylate-binding protein 4                                       | 121   | 129  |
| treated | KSSGAPASW         | W          | 9      | Q8IX18    | Probable ATP-dependent RNA helicase DHX40                         | 564   | 572  |
| treated | KTFTGHREW         | W          | 9      | P43034    | Platelet-activating factor acetylhydrolase IB subunit alpha       | 228   | 236  |
| treated | KTPsQRNKW         | W          | 9      | Q8IVF7    | Formin-like protein 3                                             | 957   | 965  |
| treated | KTSDPGRSW         | W          | 9      | Q96JI7    | Spatacsin                                                         | 405   | 413  |
| treated | LAALRHARW         | W          | 9      | Q9UPR6    | Zinc finger RNA-binding protein 2                                 | 769   | 777  |
| treated | MSKEKKEEW         | W          | 9      | Q08945    | FACT complex subunit SSRP1                                        | 588   | 596  |
| treated | MTNGFHMTW         | W          | 9      | Q68CL5    | Tubulin polyglutamylase complex subunit 2                         | 71    | 79   |
| treated | NSKRKAETW         | W          | 9      | Q9Y2H1    | Serine/threonine-protein kinase 38-like                           | 264   | 272  |
| treated | NSNRDRREW         | W          | 9      | O95104    | Splicing factor, arginine/serine-rich 15                          | 1025  | 1033 |
| treated | QSLKSTAKW         | W          | 9      | O43665    | Regulator of G-protein signaling 10                               | 22    | 30   |
| treated | RSRHTDSW          | W          | 9      | Q9H089    | Large subunit GTPase 1 homolog                                    | 25    | 33   |
| treated | RSRRDQKW          | W          | 9      | P62266    | 40S ribosomal protein S23                                         | 14    | 22   |
| treated | RSKAEGKRW         | W          | 9      | Q9UNY4    | Transcription termination factor 2                                | 80    | 88   |
| treated | RSKsRSRSW         | W          | 9      | O75494    | FUS-interacting serine-arginine-rich protein 1                    | 246   | 254  |
| treated | RTKEEVNEW         | W          | 9      | Q9UKD2    | mRNA turnover protein 4 homolog                                   | 107   | 115  |
| treated | RTKQAREW          | W          | 9      | Q8IY17    | Neuropathy target esterase                                        | 1022  | 1030 |
| treated | RTREEGKDW         | W          | 9      | Q5JSZ5    | Uncharacterized protein KIAA0515                                  | 427   | 435  |
| treated | SAKKASTLW         | W          | 9      | Q9P275    | Ubiquitin carboxyl-terminal hydrolase 36                          | 692   | 700  |
| treated | SSARGSRLW         | W          | 9      | Q8WUJ1    | Cytochrome b5 domain-containing protein 2                         | 180   | 188  |
| treated | SSDKSVKVV         | W          | 9      | Q9GZS3    | WD repeat-containing protein 61                                   | 251   | 259  |
| treated | SSKPDPSQW         | W          | 9      | O75410    | Transforming acidic coiled-coil-containing protein 1              | 381   | 389  |
| treated | STKEMRNNW         | W          | 9      | Q63HN8    | RING finger protein 213                                           | 2742  | 2750 |
| treated | THNQSRKW          | W          | 9      | P47914    | 60S ribosomal protein L29                                         | 8     | 16   |
| treated | TSTKTDQRW         | W          | 9      | P49959    | Double-strand break repair protein MRE11A                         | 658   | 666  |
| treated | VSDASKPSW         | W          | 9      | Q724G4    | tRNA guanosine-2'-O-methyltransferase TRM11 homolog               | 288   | 296  |
| treated | VSEQHEHW          | W          | 9      | Q7L590    | Protein MCM10 homolog                                             | 798   | 806  |
| treated | VSNDRTQTW         | W          | 9      | Q9Y2H8    | Zinc finger protein 510                                           | 365   | 373  |
| treated | VSRIQEAW          | W          | 9      | Q9UI10    | Translation initiation factor eIF-2B subunit delta                | 342   | 350  |
| treated | VTDNAVYHW         | W          | 9      | Q00610    | Clathrin heavy chain 1                                            | 122   | 130  |
| treated | VTNPHTDAW         | W          | 9      | O75293    | Growth arrest and DNA-damage-inducible protein GADD45 beta        | 122   | 130  |
| treated | VVKNSVHSW         | W          | 9      | Q9NV11    | Fanconi anemia group I protein                                    | 367   | 375  |
| treated | AAKPEQIQKW        | W          | 10     | Q99986    | Serine/threonine-protein kinase VRK1                              | 90    | 99   |
| treated | ATSTEKSAW         | W          | 10     | Q8WZ64    | Centaurin-delta-1                                                 | 311   | 320  |
| treated | AVNPRDPPSW        | W          | 10     | Q9Y490    | Talin-1                                                           | 1621  | 1630 |
| treated | ESSRDASRKW        | W          | 10     | Q8TCU6    | Phosphatidylinositol 3,4,5-trisphosphate-dependent Rac exchanger  | 1358  | 1367 |
| treated | GSADKTVALW        | W          | 10     | Q16576    | Histone-binding protein RBBP7                                     | 291   | 300  |
| treated | GSSDSTVRVW        | W          | 10     | Q9UKB1    | F-box/WD repeat-containing protein 11                             | 296   | 305  |
| treated | HSVDSGSKRW        | W          | 10     | O75427    | Leucine-rich repeat/calponin homology domain-containing protein 4 | 303   | 312  |
| treated | HTTHNQSRKW        | W          | 10     | P47914    | 60S ribosomal protein L29                                         | 7     | 16   |
| treated | ISSSQDGHQW        | W          | 10     | P00451    | Coagulation factor VIII                                           | 2281  | 2290 |
| treated | KALETDDKDW        | W          | 10     | O60645    | Exocyst complex component 3                                       | 408   | 417  |
| treated | KSRGSGEQDW        | W          | 10     | Q725L9    | Interferon regulatory factor 2-binding protein 2                  | 289   | 298  |
| treated | KSSIAGSSTW        | W          | 10     | Q99808    | Equilibrative nucleoside transporter 1                            | 315   | 324  |
| treated | KSSTPNHKKW        | W          | 10     | P11388    | DNA topoisomerase 2-alpha                                         | 599   | 608  |
| treated | KTGETASKRW        | W          | 10     | Q8TCF1    | AN1-type zinc finger protein 1                                    | 122   | 131  |
| treated | KVGSVSVSGW        | W          | 10     | Q8WUM9    | Sodium-dependent phosphate transporter 1                          | 626   | 635  |
| treated | LALPPGAEHW        | W          | 10     | P42768    | Wiskott-Aldrich syndrome protein                                  | 55    | 64   |
| treated | QANSHKERGW        | W          | 10     | P13051    | Uracil-DNA glycosylase                                            | 222   | 231  |
| treated | RSRSTTAHSW        | W          | 10     | Q9UKJ3    | G patch domain-containing protein 8                               | 560   | 569  |
| treated | RTMNIKSATW        | W          | 10     | Q16665    | Hypoxia-inducible factor 1 alpha                                  | 180   | 189  |
| treated | RVRSHLAALW        | W          | 10     | P35613    | Basigin                                                           | 317   | 326  |
| treated | SATSSSQRDW        | W          | 10     | Q96T88    | E3 ubiquitin-protein ligase UHRF1                                 | 388   | 397  |
| treated | TSSSVRVEW         | W          | 10     | Q9NZ45    | CDGSH iron sulfur domain-containing protein 1                     | 4     | 13   |
| treated | VTQRKDDSTW        | W          | 10     | Q9HB58    | Sp110 nuclear body protein                                        | 395   | 404  |
| treated | GTYSGKAADVW       | W          | 11     | Q96RU8    | Tribbles homolog 1                                                | 258   | 268  |
| treated | ITSQVTGQIGW       | W          | 11     | Q96CW1    | AP-2 complex subunit mu-1                                         | 151   | 161  |
| treated | KGDPPQSPGRHW      | W          | 11     | Q5SYE7    | NHS-like protein 1                                                | 465   | 475  |
| treated | KTEDTQGKKKW       | W          | 11     | Q9ULH0    | Ankyrin repeat-rich membrane spanning protein                     | 641   | 651  |
| treated | LTKEDGEKETW       | W          | 11     | Q9NUA8    | Zinc finger and BTB domain-containing protein 40                  | 670   | 680  |
| treated | QTKAKVTGDEW       | W          | 11     | P13807    | Glycogen [starch] synthase, muscle                                | 48    | 58   |
| treated | RSAPQKGSSSW       | W          | 12     | Q99607    | ETS-related transcription factor Elf-4                            | 337   | 348  |

| Sample    | Peptide Sequence* | C-terminus | Length | Accession | Source Protein                                                    | Start | Stop |
|-----------|-------------------|------------|--------|-----------|-------------------------------------------------------------------|-------|------|
| treated   | RTPTKKEKDQAW      | W          | 12     | O75528    | Transcriptional adapter 3-like                                    | 406   | 417  |
| treated   | KSKTNSQKGASSTW    | W          | 14     | Q03701    | CCAAT/enhancer-binding protein zeta                               | 221   | 234  |
| treated   | KTKQASKNTEKESAW   | W          | 15     | Q8WYP5    | AT-hook-containing transcription factor 1                         | 2206  | 2220 |
| treated   | RARESYKY          | Y          | 8      | Q9P0U4    | CpG-binding protein                                               | 211   | 218  |
| treated   | RTRKSINY          | Y          | 8      | Q9NRZ9    | Lymphoid-specific helicase                                        | 511   | 518  |
| treated   | ATSTIKRMY         | Y          | 9      | Q15361    | Transcription termination factor 1                                | 509   | 517  |
| treated   | ITKTVQQR          | Y          | 9      | Q8IZT6    | Abnormal spindle-like microcephaly-associated protein             | 2215  | 2223 |
| treated   | KAALKKEKY         | Y          | 9      | P09429    | High mobility group protein B1                                    | 147   | 155  |
| treated   | KALIYQKKY         | Y          | 9      | Q99996    | A-kinase anchor protein 9                                         | 3717  | 3725 |
| treated   | KSAVKNEEY         | Y          | 9      | Q14680    | Maternal embryonic leucine zipper kinase                          | 430   | 438  |
| treated   | KSKVSEQR          | Y          | 9      | Q9HA38    | Zinc finger matrin-type protein 3                                 | 271   | 279  |
| treated   | KTGVDLRHY         | Y          | 9      | Q8N1B4    | Vacuolar protein sorting-associated protein 52 homolog            | 75    | 83   |
| treated   | KTKKIKEY          | Y          | 9      | Q58FF8    | Putative heat shock protein HSP 90-beta 2                         | 190   | 198  |
| treated   | KTKKKYATY         | Y          | 9      | Q8IZT6    | Abnormal spindle-like microcephaly-associated protein             | 2058  | 2066 |
| treated   | KTNLRRTY          | Y          | 9      | P17844    | Probable ATP-dependent RNA helicase DDX5                          | 236   | 244  |
| treated   | KTRGNTPKY         | Y          | 9      | O00567    | Nucleolar protein 5A                                              | 340   | 348  |
| treated   | KTVEPLEYY         | Y          | 9      | Q96B26    | Exosome complex exonuclease RRP43                                 | 6     | 14   |
| treated   | KVRDQQLVY         | Y          | 9      | Q9UJX6    | Anaphase-promoting complex subunit 2                              | 802   | 810  |
| treated   | RSKEDGRLY         | Y          | 9      | Q99640    | Membrane-associated Tyr/Thr-specific cdc2-inhibitory kinase       | 128   | 136  |
| treated   | RSRsRDRMY         | Y          | 9      | Q9NYF8    | Bcl-2-associated transcription factor 1                           | 45    | 53   |
| treated   | RSRsREQSY         | Y          | 9      | Q96594    | Cyclin-L2                                                         | 383   | 391  |
| treated   | RTIKKQRKY         | Y          | 9      | Q00059    | Transcription factor A, mitochondrial                             | 233   | 241  |
| treated   | RVNTTQKRY         | Y          | 9      | P36578    | 60S ribosomal protein L4                                          | 114   | 122  |
| treated   | ITRKGGERTY        | Y          | 10     | O75643    | U5 small nuclear ribonucleoprotein 200 kDa helicase               | 596   | 605  |
| treated   | KSKPVNKDRY        | Y          | 10     | P62316    | Small nuclear ribonucleoprotein Sm D2                             | 86    | 95   |
| treated   | KSLQNAQKH         | Y          | 10     | Q14683    | Structural maintenance of chromosomes protein 1A                  | 317   | 326  |
| treated   | KSRDGERTVY        | Y          | 10     | Q13263    | Transcription intermediary factor 1-beta                          | 199   | 208  |
| treated   | KTKEGRDQLY        | Y          | 10     | Q9NS00    | Glycoprotein-N-acetylgalactosamine 3-beta-galactosyltransferase 1 | 135   | 144  |
| treated   | RSKPPATVHY        | Y          | 10     | Q9NQC8    | UPF0360 protein C11orf60                                          | 191   | 200  |
| treated   | RSMESRSHHY        | Y          | 10     | Q5THJ4    | Vacuolar protein sorting-associated protein 13D                   | 228   | 237  |
| treated   | RSRDDADRRY        | Y          | 10     | Q5BJF6    | Outer dense fiber protein 2                                       | 763   | 772  |
| treated   | RVADQRKKAY        | Y          | 10     | P09669    | Cytochrome c oxidase polypeptide VIc                              | 40    | 49   |
| treated   | VTRPDSGHL         | Y          | 10     | Q15418    | Ribosomal protein S6 kinase alpha-1                               | 82    | 91   |
| treated   | KAAEAHVDAHY       | Y          | 11     | P55263    | Adenosine kinase                                                  | 119   | 129  |
| treated   | KTKPNTKDHGY       | Y          | 11     | Q12824    | SWI/SNF regulator of chromatin subfamily B member 1               | 71    | 81   |
| treated   | KTYTGHKNEKY       | Y          | 11     | P61964    | WD repeat-containing protein 5                                    | 250   | 260  |
| untreated | PKKALHFF          | F          | 8      | O95602    | DNA-directed RNA polymerase I subunit RPA1                        | 1062  | 1069 |
| untreated | RSKIAETF          | F          | 8      | Q9Y5A7    | NEDD8 ultimate buster 1                                           | 113   | 120  |
| untreated | RTRRAVKF          | F          | 8      | P83731    | 60S ribosomal protein L24                                         | 71    | 78   |
| untreated | ASLPLRVSF         | F          | 9      | O96005    | Cleft lip and palate transmembrane protein 1                      | 299   | 307  |
| untreated | ATKKEITFF         | F          | 9      | P20592    | Interferon-induced GTP-binding protein Mx2                        | 342   | 350  |
| untreated | ATRKAFTTF         | F          | 9      | Q14643    | Inositol 1,4,5-trisphosphate receptor type 1                      | 1930  | 1938 |
| untreated | GTFRGTRYF         | F          | 9      | Q9NQC7    | Probable ubiquitin carboxyl-terminal hydrolase CYLD               | 516   | 524  |
| untreated | GTKKQFQKF         | F          | 9      | P62280    | 40S ribosomal protein S11                                         | 150   | 158  |
| untreated | GVHTVHVTF         | F          | 9      | P21333    | Filamin-A                                                         | 452   | 460  |
| untreated | ISNPKTAEF         | F          | 9      | Q9NSD9    | Phenylalanyl-tRNA synthetase beta chain                           | 439   | 447  |
| untreated | ISVPIFKQF         | F          | 9      | Q00341    | Vigilin                                                           | 584   | 592  |
| untreated | ITKRKEVIF         | F          | 9      | Q8NCY6    | Coiled-coil domain-containing protein KIAA1826                    | 24    | 32   |
| untreated | ITKTQKVRF         | F          | 9      | O60287    | Nucleolar pre-ribosomal-associated protein 1                      | 257   | 265  |
| untreated | ITTTINPRF         | F          | 9      | P26010    | Integrin beta-7                                                   | 782   | 790  |
| untreated | KAIEKNVLF         | F          | 9      | P10644    | cAMP-dependent protein kinase type I-alpha regulatory subunit     | 130   | 138  |
| untreated | KAKDLIRF          | F          | 9      | Q15208    | Serine/threonine-protein kinase 38                                | 352   | 360  |
| untreated | KAKDLLALF         | F          | 9      | Q9H501    | ESF1 homolog                                                      | 361   | 369  |
| untreated | KAKEIYMTF         | F          | 9      | O43665    | Regulator of G-protein signaling 10                               | 81    | 89   |
| untreated | KALKRIHQF         | F          | 9      | O00311    | Cell division cycle 7-related protein kinase                      | 163   | 171  |
| untreated | KASGTIKKF         | F          | 9      | Q2NL67    | Poly [ADP-ribose] polymerase 6                                    | 162   | 170  |
| untreated | KASPTQNL          | F          | 9      | P05120    | Plasminogen activator inhibitor 2                                 | 21    | 29   |
| untreated | KIKDFASHF         | F          | 9      | Q8ND82    | Zinc finger protein 280C                                          | 627   | 635  |
| untreated | KSFDFHGF          | F          | 9      | Q13432    | Protein unc-119 homolog A                                         | 173   | 181  |
| untreated | KSHFRNHKF         | F          | 9      | Q5JTD0    | Tight junction-associated protein 1                               | 183   | 191  |
| untreated | KSHTVVIGF         | F          | 9      | Q8NG31    | Protein CASC5                                                     | 792   | 800  |
| untreated | KSKDISKTF         | F          | 9      | Q14651    | Plastin-1                                                         | 84    | 92   |
| untreated | KSLEEIYLF         | F          | 9      | P15880    | 40S ribosomal protein S2                                          | 76    | 84   |

| Sample    | Peptide Sequence* | C-terminus | Length | Accession | Source Protein                                                | Start | Stop |
|-----------|-------------------|------------|--------|-----------|---------------------------------------------------------------|-------|------|
| untreated | KSMKVVKLF         | F          | 9      | Q9Y291    | 28S ribosomal protein S33, mitochondrial                      | 29    | 37   |
| untreated | KSVTLGYLF         | F          | 9      | P55265    | Double-stranded RNA-specific adenosine deaminase              | 1063  | 1071 |
| untreated | KSWVFGVHF         | F          | 9      | P32248    | C-C chemokine receptor type 7                                 | 120   | 128  |
| untreated | KTAENFRQF         | F          | 9      | O43447    | Peptidyl-prolyl cis-trans isomerase H                         | 38    | 46   |
| untreated | KTRPRKRF          | F          | 9      | Q86TA1    | Mps one binder kinase activator-like 2B                       | 13    | 21   |
| untreated | KTGNVVKRF         | F          | 9      | Q8NA23    | WD repeat-containing protein 31                               | 91    | 99   |
| untreated | KTILPLINF         | F          | 9      | P16885    | 1-phosphatidylinositol-4,5-bisphosphate phosphodiesterase     | 167   | 175  |
| untreated | KTLPDILTF         | F          | 9      | Q13569    | G/T mismatch-specific thymine DNA glycosylase                 | 122   | 130  |
| untreated | KVLDKMKSF         | F          | 9      | P06744    | Glucose-6-phosphate isomerase                                 | 124   | 132  |
| untreated | LARRLLNRF         | F          | 9      | P46777    | 60S ribosomal protein L5                                      | 105   | 113  |
| untreated | LSKSDHSFF         | F          | 9      | P01906    | HLA class II histocompatibility antigen, DQ                   | 164   | 172  |
| untreated | LTAVVQKRF         | F          | 9      | P23396    | 40S ribosomal protein S3                                      | 69    | 77   |
| untreated | RAKAIIVEF         | F          | 9      | O60841    | Eukaryotic translation initiation factor 5B                   | 790   | 798  |
| untreated | RANVNARTF         | F          | 9      | Q00653    | Nuclear factor NF-kappa-B p100 subunit                        | 658   | 666  |
| untreated | RAYLAQRKF         | F          | 9      | O14579    | Coatomer subunit epsilon                                      | 58    | 66   |
| untreated | RIKPRPERF         | F          | 9      | Q9NP77    | RNA polymerase II subunit A C-terminal domain phosphatase     | 90    | 98   |
| untreated | RSFHEVERF         | F          | 9      | Q92963    | GTP-binding protein Rit1                                      | 106   | 114  |
| untreated | RSKPLFHHF         | F          | 9      | Q03113    | Guanine nucleotide-binding protein subunit alpha-12           | 342   | 350  |
| untreated | RSRQEPSRF         | F          | 9      | O14647    | Chromodomain-helicase-DNA-binding protein 2                   | 114   | 122  |
| untreated | RSVLHHFHF         | F          | 9      | Q15269    | Periodic tryptophan protein 2 homolog                         | 87    | 95   |
| untreated | RTKPFHRKF         | F          | 9      | Q9Y5S2    | Serine/threonine-protein kinase MRCK beta                     | 1359  | 1367 |
| untreated | RTNIKRKTF         | F          | 9      | Q15022    | Polycomb protein SUZ12                                        | 124   | 132  |
| untreated | RTRRYVRKF         | F          | 9      | O43633    | Charged multivesicular body protein 2a                        | 68    | 76   |
| untreated | RTTNLIRHF         | F          | 9      | Q14592    | Zinc finger protein 460                                       | 459   | 467  |
| untreated | SSQKRHWTF         | F          | 9      | P51946    | Cyclin-H                                                      | 5     | 13   |
| untreated | TALPLLKQF         | F          | 9      | Q9Y2P8    | RNA 3'-terminal phosphate cyclase-like protein                | 135   | 143  |
| untreated | VAKVGQYTF         | F          | 9      | Q86Y39    | NADH dehydrogenase [ubiquinone] 1 alpha subcomplex subunit 11 | 53    | 61   |
| untreated | VSAQIRKNF         | F          | 9      | Q8IU85    | Calcium/calmodulin-dependent protein kinase type 1D           | 293   | 301  |
| untreated | VSKPDLITF         | F          | 9      | Q14586    | Zinc finger protein 267                                       | 47    | 55   |
| untreated | YAVRDREMF         | F          | 9      | O95298    | NADH dehydrogenase [ubiquinone] 1 subunit C2                  | 82    | 90   |
| untreated | ISKQDAQELF        | F          | 10     | Q9BZJ0    | Crooked neck-like protein 1                                   | 443   | 452  |
| untreated | ITEKKAIKRF        | F          | 10     | O75643    | U5 small nuclear ribonucleoprotein 200 kDa helicase           | 692   | 701  |
| untreated | KSAEHFKRF         | F          | 10     | Q8IXW5    | RNA polymerase II-associated protein 2                        | 332   | 341  |
| untreated | KSKESESVFV        | F          | 10     | A2VDJ0    | Transmembrane protein 131-like                                | 570   | 579  |
| untreated | KSLALKEKHF        | F          | 10     | Q92673    | Sortilin-related receptor                                     | 2044  | 2053 |
| untreated | KSRGIGTVTF        | F          | 10     | P52272    | Heterogeneous nuclear ribonucleoprotein M                     | 242   | 251  |
| untreated | KSSQVQRRFF        | F          | 10     | P13010    | ATP-dependent DNA helicase 2 subunit 2                        | 347   | 356  |
| untreated | KTRGIFETKF        | F          | 10     | P52789    | Hexokinase-2                                                  | 777   | 786  |
| untreated | KTSEAKIKHF        | F          | 10     | Q02880    | DNA topoisomerase 2-beta                                      | 221   | 230  |
| untreated | RAGPLSGKFF        | F          | 10     | P17844    | Probable ATP-dependent RNA helicase DDX5                      | 25    | 34   |
| untreated | RSKEGLTERF        | F          | 10     | Q15046    | Lysyl-tRNA synthetase                                         | 477   | 486  |
| untreated | RSVPHLQKVF        | F          | 10     | P07355    | Annexin A2                                                    | 220   | 229  |
| untreated | TTDGYLRLF         | F          | 10     | P61247    | 40S ribosomal protein S3a                                     | 129   | 138  |
| untreated | ASKGPEALQEF       | F          | 11     | Q2TAL8    | Glutamine-rich protein 1                                      | 35    | 45   |
| untreated | ISAPDKRIYQF       | F          | 11     | O75563    | Src kinase-associated phosphoprotein 2                        | 189   | 199  |
| untreated | ITSSAKVDMTF       | F          | 11     | Q14318    | FK506-binding protein 8                                       | 251   | 261  |
| untreated | KAFAETHIKGF       | F          | 11     | P42704    | Leucine-rich PPR motif-containing protein, mitochondrial      | 1090  | 1100 |
| untreated | KARVETQNHWF       | F          | 11     | P28066    | Proteasome subunit alpha type-5                               | 91    | 101  |
| untreated | KAVRDALKTEF       | F          | 11     | P56381    | ATP synthase subunit epsilon, mitochondrial                   | 21    | 31   |
| untreated | KSFETDTNLF        | F          | 11     | P01848    | T-cell receptor alpha chain C region                          | 103   | 113  |
| untreated | KSKDIVNKMTF       | F          | 11     | P52732    | Kinesin-like protein KIF11                                    | 757   | 767  |
| untreated | KSRGSNLRVHF       | F          | 11     | P18621    | 60S ribosomal protein L17                                     | 16    | 26   |
| untreated | KTKLDPKAVF        | F          | 11     | Q9HCE5    | Methyltransferase-like protein KIAA1627                       | 271   | 281  |
| untreated | KTRGDHFKLRF       | F          | 11     | O43257    | Zinc finger HIT domain-containing protein 1                   | 70    | 80   |
| untreated | KTRSSRAGLQF       | F          | 11     | Q96KK5    | Histone H2A type 1-H                                          | 16    | 26   |
| untreated | KVDEVKSTIKF       | F          | 11     | P62906    | 60S ribosomal protein L10a                                    | 147   | 157  |
| untreated | KVLKEIVERVF       | F          | 11     | Q14444    | Caprin-1                                                      | 231   | 241  |
| untreated | RADPKKALHFF       | F          | 11     | O95602    | DNA-directed RNA polymerase I subunit RPA1                    | 1059  | 1069 |
| untreated | RTKDLIEQRF        | F          | 11     | Q00341    | Vigilin                                                       | 508   | 518  |
| untreated | RTLVPDSSHGF       | F          | 11     | Q6P4F7    | Rho GTPase-activating protein 11A                             | 328   | 338  |
| untreated | RVDPAKGLFYF       | F          | 11     | O75643    | U5 small nuclear ribonucleoprotein 200 kDa helicase           | 666   | 676  |
| untreated | KSIDGKDAVHSF      | F          | 12     | Q8NEL9    | Phospholipase DDHD1                                           | 331   | 342  |
| untreated | KTKKPLLI          | I          | 8      | Q9BSR8    | Protein YIPF4                                                 | 220   | 227  |

| Sample    | Peptide Sequence* | C-terminus | Length | Accession | Source Protein                                                   | Start | Stop |
|-----------|-------------------|------------|--------|-----------|------------------------------------------------------------------|-------|------|
| untreated | FSKRIQKSI         | I          | 9      | O75446    | Histone deacetylase complex subunit SAP30                        | 85    | 93   |
| untreated | HTKRMQHVH         | I          | 9      | Q9NV06    | WD repeat and SOF domain-containing protein 1                    | 321   | 329  |
| untreated | KARDTKVLI         | I          | 9      | Q9UBH6    | Xenotropic and polytropic retrovirus receptor 1                  | 679   | 687  |
| untreated | KSMKREYII         | I          | 9      | Q8WYP5    | AT-hook-containing transcription factor 1                        | 259   | 267  |
| untreated | KTKIYHPNI         | I          | 9      | P68036    | Ubiquitin-conjugating enzyme E2 L3                               | 71    | 79   |
| untreated | KTRQIISTI         | I          | 9      | P37268    | Squalene synthetase                                              | 358   | 366  |
| untreated | KTRQTIPRI         | I          | 9      | Q65J93    | Protein FAM111B                                                  | 337   | 345  |
| untreated | KVMSQRHMI         | I          | 9      | Q13148    | TAR DNA-binding protein 43                                       | 160   | 168  |
| untreated | RALPHHRVI         | I          | 9      | Q5JPE7    | Nodal modulator 2                                                | 1028  | 1036 |
| untreated | VSKPLAHHI         | I          | 9      | P55145    | Protein ARMET                                                    | 89    | 97   |
| untreated | KSAEAVGVKI        | I          | 10     | P27694    | Replication protein A 70 kDa DNA-binding subunit                 | 103   | 112  |
| untreated | KTGDHTLVQTI       | I          | 11     | Q14684    | Ribosomal RNA processing protein 1 homolog B                     | 202   | 212  |
| untreated | RTLEDRGIRKI       | I          | 11     | Q9Y2X3    | Nucleolar protein 5                                              | 396   | 406  |
| untreated | ASRPPVTL          | L          | 8      | Q15365    | Poly                                                             | 93    | 100  |
| untreated | ISSTVQRQL         | L          | 9      | Q6PJF5    | Rhomboid family member 2                                         | 386   | 394  |
| untreated | KALELERKL         | L          | 9      | Q9BWW8    | Apolipoprotein L6                                                | 274   | 282  |
| untreated | KAMELIREL         | L          | 9      | Q14691    | DNA replication complex GINS protein PSF1                        | 5     | 13   |
| untreated | KAYEIEKRL         | L          | 9      | Q9UPP1    | PHD finger protein 8                                             | 381   | 389  |
| untreated | KAYPKRPLL         | L          | 9      | Q9GZR7    | ATP-dependent RNA helicase DDX24                                 | 381   | 389  |
| untreated | KSIVKVKKL         | L          | 9      | Q14692    | Ribosome biogenesis protein BMS1 homolog                         | 1019  | 1027 |
| untreated | KSIRQRNLL         | L          | 9      | P23458    | Tyrosine-protein kinase JAK1                                     | 227   | 235  |
| untreated | KTFTIKRFL         | L          | 9      | Q96EH5    | 60S ribosomal protein L39-like                                   | 5     | 13   |
| untreated | KTFVGRAKL         | L          | 9      | Q9Y4K1    | Absent in melanoma 1 protein                                     | 301   | 309  |
| untreated | KTKEAVLLL         | L          | 9      | P36578    | 60S ribosomal protein L4                                         | 163   | 171  |
| untreated | KTLATQRRL         | L          | 9      | Q9UIF9    | Bromodomain adjacent to zinc finger domain protein 2A            | 772   | 780  |
| untreated | KTLEERSYLL        | L          | 9      | P23921    | Ribonucleoside-diphosphate reductase large subunit               | 149   | 157  |
| untreated | KTRSPKPLL         | L          | 9      | Q13724    | Mannosyl-oligosaccharide glucosidase                             | 108   | 116  |
| untreated | KTVRGRPKL         | L          | 9      | Q6NYC1    | Histone arginine demethylase JMJD6                               | 300   | 308  |
| untreated | KVREIIQKL         | L          | 9      | P13797    | Plastin-3                                                        | 49    | 57   |
| untreated | RSIEKRDTL         | L          | 9      | Q9H6F5    | Coiled-coil domain-containing protein 86                         | 337   | 345  |
| untreated | RSRKLKFL          | L          | 9      | P41252    | Isoleucyl-tRNA synthetase, cytoplasmic                           | 1225  | 1233 |
| untreated | RSVRLYHLL         | L          | 9      | Q14137    | Ribosome biogenesis protein BOP1                                 | 600   | 608  |
| untreated | RTVEKTWKL         | L          | 9      | Q13191    | E3 ubiquitin-protein ligase CBL-B                                | 44    | 52   |
| untreated | YSARQRRRL         | L          | 9      | P62841    | 40S ribosomal protein S15                                        | 37    | 45   |
| untreated | KISRETGEKL        | L          | 10     | O60880    | SH2 domain-containing protein 1A                                 | 10    | 19   |
| untreated | KTMLDDDKRQL       | L          | 11     | Q9HAW4    | Claspin                                                          | 1104  | 1114 |
| untreated | VASKEIGKRKL       | L          | 11     | O60293    | Coiled-coil domain-containing protein 131                        | 923   | 933  |
| untreated | WTSRQVGERTL       | L          | 11     | Q9C0K3    | Actin-related protein 11                                         | 24    | 34   |
| untreated | RTGKSYLM          | M          | 8      | Q96PP8    | Guanylate-binding protein 5                                      | 48    | 55   |
| untreated | KSIHIVVTM         | M          | 9      | Q13291    | Signaling lymphocytic activation molecule                        | 58    | 66   |
| untreated | KTKIDIIRM         | M          | 9      | Q16512    | Serine/threonine-protein kinase N1                               | 174   | 182  |
| untreated | KTKEVAKM          | M          | 9      | Q9NRD5    | PRKCA-binding protein                                            | 81    | 89   |
| untreated | MARKINFLM         | M          | 9      | P82921    | 28S ribosomal protein S21, mitochondrial                         | 68    | 76   |
| untreated | KSLPAEINRM        | M          | 10     | Q9H9A6    | Leucine-rich repeat-containing protein 40                        | 210   | 219  |
| untreated | HKQKQKvKRkLkNQ    | Q          | 14     | Q6UB98    | Ankyrin repeat domain-containing protein 12                      | 466   | 479  |
| untreated | HSVEVHKW          | W          | 8      | Q96CP6    | GRAM domain-containing protein 1A                                | 674   | 681  |
| untreated | HSYRGHLW          | W          | 8      | P40337    | Von Hippel-Lindau disease tumor suppressor                       | 110   | 117  |
| untreated | IAKIPNFW          | W          | 8      | Q01105    | Protein SET                                                      | 88    | 95   |
| untreated | KIKVPVDW          | W          | 8      | P13796    | Plastin-2                                                        | 432   | 439  |
| untreated | LSKIGEVM          | W          | 8      | Q8WYP5    | AT-hook-containing transcription factor 1                        | 1068  | 1075 |
| untreated | RTRKEAAW          | W          | 8      | O15131    | Importin subunit alpha-6                                         | 393   | 400  |
| untreated | RVVKHFYW          | W          | 8      | O00626    | C-C motif chemokine 22                                           | 48    | 55   |
| untreated | VSKTSIGW          | W          | 8      | Q9NR09    | Baculoviral IAP repeat-containing protein 6                      | 3295  | 3302 |
| untreated | AAKAVLADW         | W          | 9      | Q9NVN8    | Guanine nucleotide-binding protein-like 3-like protein           | 384   | 392  |
| untreated | AARKHILVW         | W          | 9      | Q6P5X5    | UPF0545 protein C22orf39                                         | 77    | 85   |
| untreated | AARVLQEAW         | W          | 9      | O15554    | Intermed conductance calcium-activated potassium channel protein | 315   | 323  |
| untreated | ASAIHQRW          | W          | 9      | Q8IZT6    | Abnormal spindle-like microcephaly-associated protein            | 2068  | 2076 |
| untreated | ASAPLGARW         | W          | 9      | Q96AQ1    | Coiled-coil domain-containing protein 74A                        | 109   | 117  |
| untreated | ASKKVQRPW         | W          | 9      | P05166    | Propionyl-CoA carboxylase beta chain, mitochondrial              | 523   | 531  |
| untreated | ASLDISRKW         | W          | 9      | Q9NWU5    | 39S ribosomal protein L22, mitochondrial                         | 37    | 45   |
| untreated | ATADVEWRW         | W          | 9      | Q96G21    | U3 small nucleolar ribonucleoprotein protein IMP4                | 267   | 275  |
| untreated | ATLKGNAAW         | W          | 9      | P07814    | Bifunctional aminoacyl-tRNA synthetase                           | 126   | 134  |
| untreated | ATLKNPILW         | W          | 9      | P04844    | Dolichyl-diphosphooligosaccharide--protein glycosyltransferase   | 488   | 496  |

| Sample    | Peptide Sequence* | C-terminus | Length | Accession | Source Protein                                                   | Start | Stop |
|-----------|-------------------|------------|--------|-----------|------------------------------------------------------------------|-------|------|
| untreated | ATRSQGDLW         | W          | 9      | Q9BV29    | Uncharacterized protein C15orf57                                 | 11    | 19   |
| untreated | ATVGRRYLW         | W          | 9      | P42166    | Lamina-associated polypeptide 2, isoform alpha                   | 646   | 654  |
| untreated | AVDSTVKVW         | W          | 9      | Q6Q0C0    | E3 ubiquitin-protein ligase TRAF7                                | 660   | 668  |
| untreated | ETFHHSSNW         | W          | 9      | Q9UNY4    | Transcription termination factor 2                               | 113   | 121  |
| untreated | FSLPAQPLW         | W          | 9      | O60216    | Double-strand-break repair protein rad21 homolog                 | 373   | 381  |
| untreated | GSASVNSRW         | W          | 9      | Q55W79    | Centrosomal protein of 170 kDa                                   | 1222  | 1230 |
| untreated | GSMGLRSLW         | W          | 9      | Q9BV87    | Uncharacterized protein C2orf24                                  | 301   | 309  |
| untreated | GTHSLDIKW         | W          | 9      | Q9UHQ1    | Nuclear prelamin A recognition factor                            | 448   | 456  |
| untreated | HAAKTKQAW         | W          | 9      | Q8N3C0    | Activating signal cointegrator 1 complex subunit 3               | 2019  | 2027 |
| untreated | HARPEPSW          | W          | 9      | Q9NQ89    | Uncharacterized protein C12orf4                                  | 113   | 121  |
| untreated | HSLTKRREW         | W          | 9      | A6NDU8    | UPF0600 protein C5orf51                                          | 144   | 152  |
| untreated | HSRNLHHKW         | W          | 9      | Q13615    | Myotubularin-related protein 3                                   | 985   | 993  |
| untreated | HSSGILPKW         | W          | 9      | Q8NDX1    | PH and SEC7 domain-containing protein 4                          | 475   | 483  |
| untreated | IAAQRTINW         | W          | 9      | Q5T4S7    | E3 ubiquitin-protein ligase UBR4                                 | 3282  | 3290 |
| untreated | IALPPIAKW         | W          | 9      | P50851    | Lipopolysaccharide-responsive and beige-like anchor protein      | 217   | 225  |
| untreated | IAQSLEHSW         | W          | 9      | O43293    | Death-associated protein kinase 3                                | 266   | 274  |
| untreated | ILRPPVEKW         | W          | 9      | Q5VYS8    | Zinc finger CCHC domain-containing protein 6                     | 1432  | 1440 |
| untreated | IMKDKDNFW         | W          | 9      | P61160    | Actin-related protein 2                                          | 364   | 372  |
| untreated | ISAIPEQRW         | W          | 9      | O94953    | JmjC domain-containing histone demethylation protein 3B          | 840   | 848  |
| untreated | ISGHPETW          | W          | 9      | Q9Y385    | Ubiquitin-conjugating enzyme E2 J1                               | 94    | 102  |
| untreated | IVRKDRHLW         | W          | 9      | Q8IZT6    | Abnormal spindle-like microcephaly-associated protein            | 795   | 803  |
| untreated | KAKANLIGW         | W          | 9      | Q8WWQ0    | PH-interacting protein                                           | 1813  | 1821 |
| untreated | KAKTNVKLW         | W          | 9      | P10644    | cAMP-dependent protein kinase type I-alpha regulatory subunit    | 216   | 224  |
| untreated | KAVFLVPKW         | W          | 9      | Q9H2M9    | Rab3 GTPase-activating protein non-catalytic subunit             | 96    | 104  |
| untreated | KGKNISSHW         | W          | 9      | Q96TA2    | ATP-dependent metalloprotease YME1L1                             | 144   | 152  |
| untreated | KGRTIILKW         | W          | 9      | Q96TA2    | ATP-dependent metalloprotease YME1L1                             | 510   | 518  |
| untreated | KILSNQEEW         | W          | 9      | O75791    | GRB2-related adapter protein 2                                   | 26    | 34   |
| untreated | KLKPLLEKW         | W          | 9      | Q9UKI9    | POU domain, class 2, transcription factor 3                      | 244   | 252  |
| untreated | KLKTVKENW         | W          | 9      | Q00059    | Transcription factor A, mitochondrial                            | 181   | 189  |
| untreated | KSAFVRTQW         | W          | 9      | Q9UKY1    | Zinc fingers and homeoboxes protein 1                            | 676   | 684  |
| untreated | KSGAIIEKW         | W          | 9      | Q67FW5    | UDP-GlcNAc:betaGal beta-1,3-N-acetylglucosaminyltransferase-like | 61    | 69   |
| untreated | KSIDLIQKW         | W          | 9      | P49585    | Choline-phosphate cytidylyltransferase A                         | 270   | 278  |
| untreated | KSRLSISGW         | W          | 9      | Q8N543    | 2-oxoglutarate/Fe-dependent oxygenase domain-containing protein  | 228   | 236  |
| untreated | KTAEKQKW          | W          | 9      | Q8TCU6    | Phosphatidylinositol 3,4,5-trisphosphate-dependent Rac exchanger | 375   | 383  |
| untreated | KTQGPRALW         | W          | 9      | Q96AG3    | Solute carrier family 25 member 46                               | 152   | 160  |
| untreated | KTSSRRTTW         | W          | 9      | Q9BX40    | Protein LSM14 homolog B                                          | 327   | 335  |
| untreated | KTSVVVGTW         | W          | 9      | Q96DZ1    | XTP3-transactivated gene B protein                               | 373   | 381  |
| untreated | KTVAIHTLW         | W          | 9      | Q92835    | Phosphatidylinositol-3,4,5-trisphosphate 5-phosphatase 1         | 478   | 486  |
| untreated | KVKHGHFGW         | W          | 9      | Q13501    | Sequestosome-1                                                   | 187   | 195  |
| untreated | KVKKTIPSW         | W          | 9      | Q5SSJ5    | Heterochromatin protein 1-binding protein 3                      | 128   | 136  |
| untreated | KVLLILSKW         | W          | 9      | Q9HCE0    | UPF0493 protein KIAA1632                                         | 2394  | 2402 |
| untreated | LARVLREDW         | W          | 9      | Q92845    | Kinesin-associated protein 3                                     | 179   | 187  |
| untreated | LSKLVVVRW         | W          | 9      | Q96H35    | Probable RNA-binding protein 18                                  | 95    | 103  |
| untreated | LSQPKIVKW         | W          | 9      | P61769    | Beta-2-microglobulin                                             | 107   | 115  |
| untreated | LTSPDSEKW         | W          | 9      | Q9NR09    | Baculoviral IAP repeat-containing protein 6                      | 670   | 678  |
| untreated | LTSRVTAHW         | W          | 9      | Q9UFC0    | Leucine-rich repeat and WD repeat-containing protein 1           | 141   | 149  |
| untreated | LWKAQNTW          | W          | 9      | P02545    | Lamin-A/C                                                        | 512   | 520  |
| untreated | MSNKHGWTW         | W          | 9      | Q9Y3M8    | StAR-related lipid transfer protein 13                           | 633   | 641  |
| untreated | NSRKQEAEW         | W          | 9      | P09496    | Clathrin light chain A                                           | 127   | 135  |
| untreated | NSRSEAPNW         | W          | 9      | P60228    | Eukaryotic translation initiation factor 3 subunit E             | 429   | 437  |
| untreated | QAFPNTNRW         | W          | 9      | P26641    | Elongation factor 1-gamma                                        | 182   | 190  |
| untreated | QSAKEQIKW         | W          | 9      | P61923    | Coatomer subunit zeta-1                                          | 165   | 173  |
| untreated | QSHLNKALW         | W          | 9      | O60566    | Mitotic checkpoint serine/threonine-protein kinase BUB1 beta     | 1028  | 1036 |
| untreated | QSLQIFRKW         | W          | 9      | Q5TA45    | Integrator complex subunit 11                                    | 332   | 340  |
| untreated | QTVSPAEKW         | W          | 9      | Q16658    | Fascin                                                           | 124   | 132  |
| untreated | RAGPKKESW         | W          | 9      | Q96GQ5    | UPF0420 protein C16orf58                                         | 409   | 417  |
| untreated | RAKDRKDVW         | W          | 9      | Q4LE39    | AT-rich interactive domain-containing protein 4B                 | 920   | 928  |
| untreated | RALAHYRWW         | W          | 9      | Q9Y2R9    | 28S ribosomal protein S7, mitochondrial                          | 234   | 242  |
| untreated | RALQLHLHW         | W          | 9      | Q16790    | Carbonic anhydrase 9                                             | 221   | 229  |
| untreated | RALVKRVTW         | W          | 9      | Q9P1Y6    | PHD and RING finger domain-containing protein 1                  | 1397  | 1405 |
| untreated | RQSTILKRW         | W          | 9      | Q96CS7    | Pleckstrin homology domain-containing family B member 2          | 11    | 19   |
| untreated | RSHDTLVRW         | W          | 9      | Q9NU22    | Midasin                                                          | 177   | 185  |
| untreated | RTLKDRHW          | W          | 9      | O14776    | Transcription elongation regulator 1                             | 923   | 931  |

| Sample    | Peptide Sequence* | C-terminus | Length | Accession | Source Protein                                                 | Start | Stop |
|-----------|-------------------|------------|--------|-----------|----------------------------------------------------------------|-------|------|
| untreated | RVAHFGYHW         | W          | 9      | O15239    | NADH dehydrogenase [ubiquinone] 1 alpha subcomplex subunit 1   | 37    | 45   |
| untreated | RVKTHLPSW         | W          | 9      | P17026    | Zinc finger protein 22                                         | 203   | 211  |
| untreated | RVLREHHLW         | W          | 9      | Q9Y3M8    | StAR-related lipid transfer protein 13                         | 969   | 977  |
| untreated | RVRELYRAW         | W          | 9      | P56556    | NADH dehydrogenase [ubiquinone] 1 alpha subcomplex subunit 6   | 31    | 39   |
| untreated | RVRTPARQW         | W          | 9      | Q9BV79    | Trans-2-enoyl-CoA reductase, mitochondrial                     | 9     | 17   |
| untreated | SADGTLKLW         | W          | 9      | O14727    | Apoptotic protease-activating factor 1                         | 762   | 770  |
| untreated | SAKRVAESW         | W          | 9      | Q9H7M6    | Zinc finger SWIM domain-containing protein 4                   | 39    | 47   |
| untreated | SATRTLHEW         | W          | 9      | P27708    | CAD protein                                                    | 99    | 107  |
| untreated | SSKANPHRW         | W          | 9      | Q4G0I0    | Protein CCSMST1                                                | 54    | 62   |
| untreated | SSRNYQQHW         | W          | 9      | Q8TEM1    | Nuclear pore membrane glycoprotein 210                         | 699   | 707  |
| untreated | SSRQIISHW         | W          | 9      | Q92793    | CREB-binding protein                                           | 411   | 419  |
| untreated | SSVRAVAVW         | W          | 9      | Q9NNW5    | WD repeat-containing protein 6                                 | 775   | 783  |
| untreated | STDKTVRLW         | W          | 9      | O75529    | TAF5-like RNA polymerase II p300/CBP-associated factor         | 445   | 453  |
| untreated | STDRHIRLW         | W          | 9      | Q9GZL7    | WD repeat-containing protein 12                                | 316   | 324  |
| untreated | TAADVVKQW         | W          | 9      | Q15311    | RalA-binding protein 1                                         | 155   | 163  |
| untreated | TAKALQAHW         | W          | 9      | Q96E28    | Microspherule protein 1                                        | 247   | 255  |
| untreated | TSQDVLHSW         | W          | 9      | P00403    | Cytochrome c oxidase subunit 2                                 | 155   | 163  |
| untreated | TTAPEFRRW         | W          | 9      | P22695    | Cytochrome b-c1 complex subunit 2, mitochondrial               | 141   | 149  |
| untreated | VAKKLGEMW         | W          | 9      | Q9UGV6    | High mobility group protein 1-like 10                          | 125   | 133  |
| untreated | VSFAEKNGW         | W          | 9      | O43181    | NADH dehydrogenase iron-sulfur protein 4, mitochondrial        | 135   | 143  |
| untreated | VSKIGDKNW         | W          | 9      | Q14008    | Cytoskeleton-associated protein 5                              | 866   | 874  |
| untreated | VSTRQTQSW         | W          | 9      | Q96B23    | Uncharacterized protein C18orf25                               | 365   | 373  |
| untreated | VTRAKQIVW         | W          | 9      | P00558    | Phosphoglycerate kinase 1                                      | 328   | 336  |
| untreated | YTKFQIATW         | W          | 9      | Q15800    | C-4 methylsterol oxidase                                       | 44    | 52   |
| untreated | AAADSAVRLW        | W          | 10     | Q6IA86    | Elongator complex protein 2                                    | 133   | 142  |
| untreated | AAALPAAALW        | W          | 10     | Q03518    | Antigen peptide transporter 1                                  | 205   | 214  |
| untreated | ASARAGIHLW        | W          | 10     | Q9HAY2    | Melanoma-associated antigen F1                                 | 299   | 308  |
| untreated | ATILGNTERW        | W          | 10     | Q9UFH2    | Dynein heavy chain 17, axonemal                                | 3415  | 3424 |
| untreated | ATKVLGTVKW        | W          | 10     | P16989    | DNA-binding protein A                                          | 88    | 97   |
| untreated | AVNKMDQVNW        | W          | 10     | Q9Y450    | HBS1-like protein                                              | 404   | 413  |
| untreated | GSWDGTLRLW        | W          | 10     | P63244    | Guanine nucleotide-binding protein subunit beta-2-like 1       | 81    | 90   |
| untreated | GTKKYDLSKW        | W          | 10     | Q9UM54    | Myosin-VI                                                      | 1080  | 1089 |
| untreated | HSKAVHVAW         | W          | 10     | Q96J01    | THO complex subunit 3                                          | 54    | 63   |
| untreated | HSARVGSLSW        | W          | 10     | Q12834    | Cell division cycle protein 20 homolog                         | 267   | 276  |
| untreated | HSLNKEARKW        | W          | 10     | O94868    | FCH and double SH3 domains protein 2                           | 322   | 331  |
| untreated | HTADVQLHAW        | W          | 10     | Q8IWT0    | Protein archease                                               | 36    | 45   |
| untreated | HTAVVEDVSW        | W          | 10     | Q09028    | Histone-binding protein RBBP4                                  | 226   | 235  |
| untreated | HTEARARHAW        | W          | 10     | P41273    | Tumor necrosis factor ligand superfamily member 9              | 217   | 226  |
| untreated | HTQDVKHVVW        | W          | 10     | O76071    | Protein CIAO1                                                  | 149   | 158  |
| untreated | ISDPDVRHTW        | W          | 10     | P51805    | Plexin-A3                                                      | 1706  | 1715 |
| untreated | KAFDEKKQKW        | W          | 10     | Q53T94    | TATA box-binding protein-associated factor RNA polymerase I    | 409   | 418  |
| untreated | KAKHLASQYW        | W          | 10     | Q66K14    | TBC1 domain family member 9B                                   | 828   | 837  |
| untreated | KALSDAIKKW        | W          | 10     | Q9NWF9    | E3 ubiquitin-protein ligase RNF216                             | 406   | 415  |
| untreated | KARQGDDLGW        | W          | 10     | Q9Y237    | Peptidyl-prolyl cis-trans isomerase NIMA-interacting 4         | 75    | 84   |
| untreated | KAVDIVKQVW        | W          | 10     | Q460N5    | Poly [ADP-ribose] polymerase 14                                | 645   | 654  |
| untreated | KAWRGTLARW        | W          | 10     | B011T2    | Myosin-Ig                                                      | 719   | 728  |
| untreated | KLKKEAVRW         | W          | 10     | Q9Y220    | Suppressor of G2 allele of SKP1 homolog                        | 245   | 254  |
| untreated | KLMPGRIQLW        | W          | 10     | A0AV96    | RNA-binding protein 47                                         | 213   | 222  |
| untreated | KSEALKDRHW        | W          | 10     | Q14204    | Cytoplasmic dynein 1 heavy chain 1                             | 1404  | 1413 |
| untreated | KSFEKAKESW        | W          | 10     | Q13451    | FK506-binding protein 5                                        | 248   | 257  |
| untreated | KSHYDEAYKW        | W          | 10     | Q92624    | Amyloid protein-binding protein 2                              | 219   | 228  |
| untreated | KSLSAERERW        | W          | 10     | Q14204    | Cytoplasmic dynein 1 heavy chain 1                             | 3480  | 3489 |
| untreated | KSTPYTAVRW        | W          | 10     | O15258    | Protein RER1                                                   | 35    | 44   |
| untreated | KSVKTSVFW         | W          | 10     | Q8TCJ2    | Dolichyl-diphosphooligosaccharide--protein glycosyltransferase | 239   | 248  |
| untreated | KTKRVLPPNW        | W          | 10     | P62277    | 40S ribosomal protein S13                                      | 130   | 139  |
| untreated | KTLAEQNKW         | W          | 10     | Q99728    | BRCA1-associated RING domain protein 1                         | 209   | 218  |
| untreated | KTPEKEPLW         | W          | 10     | O14715    | RANBP2-like and GRIP domain-containing protein 8               | 626   | 635  |
| untreated | KTRDDWLVSW        | W          | 10     | P78527    | DNA-dependent protein kinase catalytic subunit                 | 3267  | 3276 |
| untreated | KSELLVRKW         | W          | 10     | Q9BVM2    | Protein DPCD                                                   | 43    | 52   |
| untreated | KVFESWMHHW        | W          | 10     | P04233    | HLA class II histocompatibility antigen gamma chain            | 179   | 188  |
| untreated | KVFKEKHSW         | W          | 10     | Q5TBB1    | Ribonuclease H2 subunit B                                      | 64    | 73   |
| untreated | KVREFNFEKW        | W          | 10     | P78347    | General transcription factor II-I                              | 345   | 354  |
| untreated | LTKSIGHQW         | W          | 10     | P00403    | Cytochrome c oxidase subunit 2                                 | 95    | 104  |

| Sample    | Peptide Sequence* | C-terminus | Length | Accession | Source Protein                                            | Start | Stop |
|-----------|-------------------|------------|--------|-----------|-----------------------------------------------------------|-------|------|
| untreated | QTRRFQTETW        | W          | 10     | Q9UHB4    | NADPH-dependent diflavin oxidoreductase 1                 | 587   | 596  |
| untreated | RARHAQGGTW        | W          | 10     | Q99832    | T-complex protein 1 subunit eta                           | 465   | 474  |
| untreated | RGFQSQVKKW        | W          | 10     | O43159    | Cerebral protein 1                                        | 282   | 291  |
| untreated | RGGDFKGRKW        | W          | 10     | Q96SK2    | Transmembrane protein 209                                 | 430   | 439  |
| untreated | RMYPKPTWW         | W          | 10     | P05023    | Sodium/potassium-transporting ATPase subunit alpha-1      | 979   | 988  |
| untreated | RSKDVAKILW        | W          | 10     | Q7L8L6    | FAST kinase domain-containing protein 5                   | 426   | 435  |
| untreated | RSLKDALFKW        | W          | 10     | P40818    | Ubiquitin carboxyl-terminal hydrolase 8                   | 275   | 284  |
| untreated | RSNQWHGRSW        | W          | 10     | Q9BTL3    | Protein FAM103A1                                          | 78    | 87   |
| untreated | RSRARAGELW        | W          | 10     | Q9BXR0    | Queuine tRNA-ribosyltransferase                           | 9     | 18   |
| untreated | RSSQFARKLW        | W          | 10     | Q62NJ1    | Neurobeachin-like protein 2                               | 2723  | 2732 |
| untreated | RSVAQAGVQW        | W          | 10     | Q6UX73    | Uncharacterized protein C16orf89                          | 321   | 330  |
| untreated | RSVGRISKQW        | W          | 10     | Q9NRY6    | Phospholipid scramblase 3                                 | 231   | 240  |
| untreated | RSWDQQIKLW        | W          | 10     | Q14493    | Histone RNA hairpin-binding protein                       | 181   | 190  |
| untreated | RTAPFHLDLW        | W          | 10     | Q9NWW5    | Ceroid-lipofuscinosis neuronal protein 6                  | 39    | 48   |
| untreated | RTAQLAKIKW        | W          | 10     | O00258    | Tryptophan-rich protein                                   | 93    | 102  |
| untreated | RTRLEQVHEW        | W          | 10     | Q9P2E3    | NFX1-type zinc finger-containing protein 1                | 1731  | 1740 |
| untreated | RTTYEKLLW         | W          | 10     | P35222    | Catenin beta-1                                            | 329   | 338  |
| untreated | RVDPDVAQHW        | W          | 10     | Q9NYR9    | NF-kappa-B inhibitor-interacting Ras-like protein 2       | 129   | 138  |
| untreated | RVINEEYKIW        | W          | 10     | Q16576    | Histone-binding protein RBBP7                             | 14    | 23   |
| untreated | RVKAEPFIKW        | W          | 10     | P55010    | Eukaryotic translation initiation factor 5                | 372   | 381  |
| untreated | SAKSARLNLW        | W          | 10     | Q7KZF4    | Staphylococcal nuclease domain-containing protein 1       | 884   | 893  |
| untreated | SSKRAELEKW        | W          | 10     | Q9UH65    | Switch-associated protein 70                              | 458   | 467  |
| untreated | SSSPEVKGYW        | W          | 10     | Q15366    | Poly                                                      | 270   | 279  |
| untreated | VAKPNIGENW        | W          | 10     | O60306    | Intron-binding protein aquarius                           | 522   | 531  |
| untreated | VSAEGLVHW         | W          | 10     | P15260    | Interferon-gamma receptor alpha chain                     | 215   | 224  |
| untreated | VSMDEKKEKW        | W          | 10     | O15260    | Surfeit locus protein 4                                   | 260   | 269  |
| untreated | AALDSRKNYNW       | W          | 11     | Q9BYN8    | 28S ribosomal protein S26, mitochondrial                  | 179   | 189  |
| untreated | ATFHQRGIALW       | W          | 11     | P55884    | Eukaryotic translation initiation factor 3 subunit B      | 350   | 360  |
| untreated | ATIKDIREHEW       | W          | 11     | P54646    | 5'-AMP-activated protein kinase catalytic subunit alpha-2 | 257   | 267  |
| untreated | FAYKDQENRW        | W          | 11     | Q99590    | SFRS2-interacting protein                                 | 772   | 782  |
| untreated | HSLGVHGLAFW       | W          | 11     | Q86X55    | Histone-arginine methyltransferase CARM1                  | 380   | 390  |
| untreated | HSGPRGTHDLW       | W          | 11     | Q04446    | 1,4-alpha-glucan-branching enzyme                         | 312   | 322  |
| untreated | HSKENPKFFW        | W          | 11     | Q8N999    | Uncharacterized protein C12orf29                          | 95    | 105  |
| untreated | HSYSPRAIHSW       | W          | 11     | P28070    | Proteasome subunit beta type-4                            | 126   | 136  |
| untreated | HTIGGSRRAAW       | W          | 11     | P61313    | 60S ribosomal protein L15                                 | 182   | 192  |
| untreated | ITIPDIKDRW        | W          | 11     | O14757    | Serine/threonine-protein kinase Chk1                      | 254   | 264  |
| untreated | ITYDDPIKTSW       | W          | 11     | Q9UJV9    | Probable ATP-dependent RNA helicase DDX41                 | 136   | 146  |
| untreated | IVDPNGLARLW       | W          | 11     | P41212    | Transcription factor ETV6                                 | 370   | 380  |
| untreated | KAKYPDYEVTW       | W          | 11     | Q9NWX4    | 14 kDa phosphohistidine phosphatase                       | 110   | 120  |
| untreated | KITSVHSRIIW       | W          | 11     | Q6IA86    | Elongator complex protein 2                               | 663   | 673  |
| untreated | KSFIQKKMQNW       | W          | 11     | Q9BY44    | Eukaryotic translation initiation factor 2A               | 121   | 131  |
| untreated | KSFSKSDLVNW       | W          | 11     | O43847    | Nardilysin                                                | 1060  | 1070 |
| untreated | KSIDAGPVDAAW      | W          | 11     | Q9GZ53    | WD repeat-containing protein 61                           | 100   | 110  |
| untreated | KSRDLFVSTSW       | W          | 11     | Q9BRQ8    | Apoptosis-inducing factor 2                               | 355   | 365  |
| untreated | KSVSAAEQQLW       | W          | 11     | Q3B7T1    | Erythroid differentiation-related factor 1                | 866   | 876  |
| untreated | KTAGYQAVKRW       | W          | 11     | Q9P0U3    | Sentrin-specific protease 1                               | 502   | 512  |
| untreated | KTVYTGIDHHW       | W          | 11     | Q9NV06    | WD repeat and SOF domain-containing protein 1             | 156   | 166  |
| untreated | KVDPADRELW        | W          | 11     | O60861    | Growth arrest-specific protein 7                          | 450   | 460  |
| untreated | LTKQGGLVKTW       | W          | 11     | Q9UN19    | Dual Adapter for phosphotyrosine and 3-phosphoinositide   | 171   | 181  |
| untreated | QTLKHPQTAKW       | W          | 11     | Q8WU76    | Sec1 family domain-containing protein 2                   | 415   | 425  |
| untreated | RAAGALSKRYW       | W          | 11     | Q9H497    | Torsin-3A                                                 | 53    | 63   |
| untreated | RAFQAHKKEENW      | W          | 11     | Q5JVF3    | PCI domain-containing protein 2                           | 93    | 103  |
| untreated | RAIAAHERQAW       | W          | 11     | Q9NNW5    | WD repeat-containing protein 6                            | 302   | 312  |
| untreated | RGTTILAKHAW       | W          | 11     | P51809    | Vesicle-associated membrane protein 7                     | 10    | 20   |
| untreated | RSTLGHRSRSHW      | W          | 11     | Q6ZNA4    | E3 ubiquitin-protein ligase Arkadia                       | 338   | 348  |
| untreated | RTREDIEGSHW       | W          | 11     | Q5XP14    | E3 ubiquitin-protein ligase RNF123                        | 715   | 725  |
| untreated | RVLPPSHRVTW       | W          | 11     | P15498    | Proto-oncogene vav                                        | 15    | 25   |
| untreated | RVLPPYFTHHW       | W          | 11     | Q9BVJ6    | U3 small nucleolar RNA-associated protein 14 homolog A    | 683   | 693  |
| untreated | SASRDKIIMW        | W          | 11     | P63244    | Guanine nucleotide-binding protein subunit beta-2-like 1  | 33    | 43   |
| untreated | SSSLDAHIRLW       | W          | 11     | Q9GZ53    | WD repeat-containing protein 61                           | 81    | 91   |
| untreated | SVSKDHALRLW       | W          | 11     | O75530    | Polycomb protein EED                                      | 208   | 218  |
| untreated | TVSEIKASLKW       | W          | 11     | Q96H20    | Vacuolar-sorting protein SNF8                             | 194   | 204  |
| untreated | VAKRNSLKELW       | W          | 11     | O43169    | Cytochrome b5 type B                                      | 28    | 38   |



| Sample    | Peptide Sequence* | C-terminus | Length | Accession | Source Protein                                               | Start | Stop |
|-----------|-------------------|------------|--------|-----------|--------------------------------------------------------------|-------|------|
| untreated | VSPFDVEKAEW       | W          | 11     | Q9BSJ8    | Extended synaptotagmin-1                                     | 131   | 141  |
| untreated | VTLHDQGTAAW       | W          | 11     | P22314    | Ubiquitin-like modifier-activating enzyme 1                  | 99    | 109  |
| untreated | VTSIGTAIRYW       | W          | 11     | O60337    | E3 ubiquitin-protein ligase MARCH6                           | 83    | 93   |
| untreated | ASAGVDTNVRW       | W          | 12     | Q13112    | Chromatin assembly factor 1 subunit B                        | 33    | 44   |
| untreated | ATSGNDGTIRVW      | W          | 12     | Q15751    | Probable E3 ubiquitin-protein ligase HERC1                   | 3444  | 3455 |
| untreated | KLADPDEVARRW      | W          | 12     | P15036    | Protein C-ets-2                                              | 392   | 403  |
| untreated | KSFQDPAKPRAW      | W          | 12     | Q9Y4C8    | Probable RNA-binding protein 19                              | 78    | 89   |
| untreated | KSHLHQKPGQTW      | W          | 12     | Q96Q83    | Alpha-ketoglutarate-dependent dioxygenase alkB homolog 3     | 31    | 42   |
| untreated | KSRGYVKEQFAW      | W          | 12     | P46783    | 40S ribosomal protein S10                                    | 53    | 64   |
| untreated | VSSSHDKSLRLW      | W          | 12     | Q9UNX4    | WD repeat-containing protein 3                               | 691   | 702  |
| untreated | RTFGHSGIAVHTW     | W          | 13     | Q9P2Q2    | FERM domain-containing protein 4A                            | 285   | 297  |
| untreated | GTWKHARRY         | Y          | 9      | Q86T03    | Transmembrane protein 55B                                    | 232   | 240  |
| untreated | ITRQKQLFY         | Y          | 9      | Q9Y690    | Putative transcription factor-like protein MORF4             | 87    | 95   |
| untreated | KARIQEAVY         | Y          | 9      | Q8TEM1    | Nuclear pore membrane glycoprotein 210                       | 219   | 227  |
| untreated | KIRELQLRY         | Y          | 9      | Q5H9J7    | Protein BEX5                                                 | 81    | 89   |
| untreated | KSFKKKFFY         | Y          | 9      | Q8N1G2    | FtsJ methyltransferase domain-containing protein 2           | 764   | 772  |
| untreated | KSFPGGKEY         | Y          | 9      | Q9Y6Q5    | AP-1 complex subunit mu-2                                    | 346   | 354  |
| untreated | KSLALLLNY         | Y          | 9      | Q9Y690    | Putative transcription factor-like protein MORF4             | 194   | 202  |
| untreated | KSRPELLEY         | Y          | 9      | Q14258    | Tripartite motif-containing protein 25                       | 447   | 455  |
| untreated | KTRIPPRTY         | Y          | 9      | Q9BWU0    | Kanadaplin                                                   | 246   | 254  |
| untreated | LTVQVARVY         | Y          | 9      | P57076    | Uncharacterized protein C21orf59                             | 27    | 35   |
| untreated | RIRRDVRVY         | Y          | 9      | Q86VU5    | Catechol-O-methyltransferase domain-containing protein 1     | 238   | 246  |
| untreated | RSILRNHRY         | Y          | 9      | Q6IN85    | Serine/threonine-protein phosphatase 4 regulatory subunit 3A | 660   | 668  |
| untreated | RSRDIRIKY         | Y          | 9      | O14511    | Pro-neuregulin-2, membrane-bound isoform                     | 279   | 287  |
| untreated | RTAHVILRY         | Y          | 9      | Q9UKV5    | Autocrine motility factor receptor, isoform 2                | 229   | 237  |
| untreated | RTKNNIQRY         | Y          | 9      | Q92665    | 28S ribosomal protein S31, mitochondrial                     | 51    | 59   |
| untreated | RTLPLVLLY         | Y          | 9      | Q9NR09    | Baculoviral IAP repeat-containing protein 6                  | 597   | 605  |
| untreated | RTRVGVVRY         | Y          | 9      | Q8NFW1    | Collagen alpha-1                                             | 74    | 82   |
| untreated | RTVRIWRQY         | Y          | 9      | O76071    | Protein CIAO1                                                | 216   | 224  |
| untreated | VSFQHPHKY         | Y          | 9      | P0C7Q3    | Cyclin-related protein FAM58B                                | 140   | 148  |
| untreated | VTTVVPKPY         | Y          | 9      | P05556    | Integrin beta-1                                              | 787   | 795  |
| untreated | KARPIPRSTY        | Y          | 10     | Q3B820    | UPF0564 protein FAM161A                                      | 356   | 365  |
| untreated | KSFPARLRQY        | Y          | 10     | Q14204    | Cytoplasmic dynein 1 heavy chain 1                           | 1371  | 1380 |
| untreated | KSVENLGSVY        | Y          | 10     | P49643    | DNA primase large subunit                                    | 54    | 63   |
| untreated | KTLTPIIQY         | Y          | 10     | Q53EL6    | Programmed cell death protein 4                              | 166   | 175  |
| untreated | KTVAGGAWTY        | Y          | 10     | P61513    | 60S ribosomal protein L37a                                   | 62    | 71   |
| untreated | QTVKDSRTVY        | Y          | 10     | P78371    | T-complex protein 1 subunit beta                             | 399   | 408  |
| untreated | RSLSDLFRRY        | Y          | 10     | O75410    | Transforming acidic coiled-coil-containing protein 1         | 686   | 695  |
| untreated | RSRKESYSVY        | Y          | 10     | P62807    | Histone H2B type 1-C/E/F/G/I                                 | 32    | 41   |
| untreated | ASMPRDIYQDY       | Y          | 11     | O15226    | NF-kappa-B-repressing factor                                 | 90    | 100  |
| untreated | GSSLPADVHRY       | Y          | 11     | Q96KA5    | Cleft lip and palate transmembrane protein 1-like protein    | 187   | 197  |
| untreated | ITKPQNLNDAY       | Y          | 11     | O60493    | Sorting nexin-3                                              | 12    | 22   |
| untreated | KIADMGLKYY        | Y          | 11     | P12004    | Proliferating cell nuclear antigen                           | 240   | 250  |
| untreated | KSMGNLKHKQY       | Y          | 11     | Q96AP4    | Zinc finger with UFM1-specific peptidase domain protein      | 538   | 548  |
| untreated | KSSPQIPHQTY       | Y          | 11     | Q16659    | Mitogen-activated protein kinase 6                           | 703   | 713  |
| untreated | KTKPTHGIGKY       | Y          | 11     | Q96GC5    | 39S ribosomal protein L48, mitochondrial                     | 49    | 59   |
| untreated | KTLPADVQNY        | Y          | 11     | Q99590    | SFRS2-interacting protein                                    | 837   | 847  |
| untreated | KTMPNTTSTRY       | Y          | 11     | Q9UPV9    | Trafficking kinesin-binding protein 1                        | 353   | 363  |
| untreated | KTRIIDGLKY        | Y          | 11     | P30876    | DNA-directed RNA polymerase II subunit RPB2                  | 436   | 446  |
| untreated | KTRTLMKDSY        | Y          | 11     | O15492    | Regulator of G-protein signaling 16                          | 158   | 168  |
| untreated | KVRESERAFTY       | Y          | 11     | Q9BYT1    | Uncharacterized MFS-type transporter C20orf59                | 146   | 156  |
| untreated | RAKPEYISKTY       | Y          | 11     | Q13823    | Nucleolar GTP-binding protein 2                              | 400   | 410  |
| untreated | KTLQHDKLVRLY      | Y          | 12     | P07948    | Tyrosine-protein kinase Lyn                                  | 295   | 306  |

\*s and t = pSer and pThr, respectively.
